# Supplementary material
Source: publisher figshare collection journal article supplement (https://acs.figshare.com/ndownloader/files/4126360)
Supplement: Supplementary file 1 [file 4126360]

 
data_11003 
 
_audit_creation_method            SHELXL-97 
_chemical_name_systematic 
; 
 ? 
; 
_chemical_name_common             ? 
_chemical_melting_point           ? 
_chemical_formula_moiety          
 'C58 H40 B2 Co N6 O6 S4, C16 H36 N, C7 H8'
_chemical_formula_sum 
 'C81 H84 B2 Co N7 O6 S4' 
_chemical_formula_weight          1460.34 
 
loop_ 
 _atom_type_symbol 
 _atom_type_description 
 _atom_type_scat_dispersion_real 
 _atom_type_scat_dispersion_imag 
 _atom_type_scat_source 
 'C'  'C'   0.0033   0.0016 
 'International Tables Vol C Tables 4.2.6.8 and 6.1.1.4' 
 'H'  'H'   0.0000   0.0000 
 'International Tables Vol C Tables 4.2.6.8 and 6.1.1.4' 
 'B'  'B'   0.0013   0.0007 
 'International Tables Vol C Tables 4.2.6.8 and 6.1.1.4' 
 'N'  'N'   0.0061   0.0033 
 'International Tables Vol C Tables 4.2.6.8 and 6.1.1.4' 
 'O'  'O'   0.0106   0.0060 
 'International Tables Vol C Tables 4.2.6.8 and 6.1.1.4' 
 'S'  'S'   0.1246   0.1234 
 'International Tables Vol C Tables 4.2.6.8 and 6.1.1.4' 
 'Co'  'Co'   0.3494   0.9721 
 'International Tables Vol C Tables 4.2.6.8 and 6.1.1.4' 
 
_symmetry_cell_setting            monoclinic 
_symmetry_space_group_name_H-M    P2(1)/n
_symmetry_space_group_name_Hall   '-P 2yn'
 
loop_ 
 _symmetry_equiv_pos_as_xyz 
 'x, y, z' 
 '-x+1/2, y+1/2, -z+1/2' 
 '-x, -y, -z' 
 'x-1/2, -y-1/2, z-1/2' 
 
_cell_length_a                    21.843(4) 
_cell_length_b                    16.346(3) 
_cell_length_c                    22.790(4) 
_cell_angle_alpha                 90.00 
_cell_angle_beta                  115.921(3) 
_cell_angle_gamma                 90.00 
_cell_volume                      7319(2) 
_cell_formula_units_Z             4 
_cell_measurement_temperature     150(2) 
_cell_measurement_reflns_used    9710
_cell_measurement_theta_min        2.35
_cell_measurement_theta_max       24.30 
 
_exptl_crystal_description        block 
_exptl_crystal_colour             red 
_exptl_crystal_size_max           0.23 
_exptl_crystal_size_mid           0.22 
_exptl_crystal_size_min           0.10 
_exptl_crystal_density_meas       ? 
_exptl_crystal_density_diffrn     1.325 
_exptl_crystal_density_method     'not measured' 
_exptl_crystal_F_000              3072 
_exptl_absorpt_coefficient_mu     0.408 
_exptl_absorpt_correction_type    multi-scan 
_exptl_absorpt_correction_T_min   0.9120 
_exptl_absorpt_correction_T_max   0.9603 
_exptl_absorpt_process_details    'SADABS, R. Blessing; 1995' 
 
_exptl_special_details 
; 
 ? 
; 
 
_diffrn_ambient_temperature       150(2) 
_diffrn_radiation_wavelength      0.71073 
_diffrn_radiation_type            MoK\a 
_diffrn_radiation_source          'fine-focus sealed tube' 
_diffrn_radiation_monochromator   graphite 
_diffrn_measurement_details  
 '0.30 degree frames measured for 30 seconds each' 
_diffrn_measurement_method        'omega and phi scans' 
_diffrn_measurement_device        'APEX Kappa Duo' 
_diffrn_measurement_device_type   'Kappa' 
_diffrn_detector                  'CCD area detector' 
_diffrn_detector_type             'Bruker APEXII'
_diffrn_detector_area_resol_mean  83.33
_diffrn_reflns_number             50424 
_diffrn_reflns_av_R_equivalents   0.0600 
_diffrn_reflns_av_sigmaI/netI     0.0705 
_diffrn_reflns_limit_h_min        -22 
_diffrn_reflns_limit_h_max        26 
_diffrn_reflns_limit_k_min        -19 
_diffrn_reflns_limit_k_max        18 
_diffrn_reflns_limit_l_min        -27 
_diffrn_reflns_limit_l_max        27 
_diffrn_reflns_theta_min          1.59 
_diffrn_reflns_theta_max          25.56 
_reflns_number_total              13549 
_reflns_number_gt                 8572 
_reflns_threshold_expression      >2sigma(I) 
 
_computing_data_collection        'APEX II v2009.5.0 (Bruker, 2010)' 
_computing_cell_refinement        'APEX II v2009.5.0 (Bruker, 2010)'
_computing_data_reduction         'APEX II v2009.5.0 (Bruker, 2010)' 
_computing_structure_solution     'SIR-2004 (Burla et al., 2005)' 
_computing_structure_refinement   'SHELXL-97 (Sheldrick, 2008)' 
_computing_molecular_graphics     'SHELXTL (Bruker, 2008)' 
_computing_publication_material   'SHELXTL (Bruker, 2008)'
 
_refine_special_details 
; 
 Refinement of F^2^ against ALL reflections.  The weighted R-factor wR and 
 goodness of fit S are based on F^2^, conventional R-factors R are based 
 on F, with F set to zero for negative F^2^. The threshold expression of 
 F^2^ > 2sigma(F^2^) is used only for calculating R-factors(gt) etc. and is 
 not relevant to the choice of reflections for refinement.  R-factors based 
 on F^2^ are statistically about twice as large as those based on F, and R- 
 factors based on ALL data will be even larger. 
; 
 
_refine_ls_structure_factor_coef  Fsqd  
_refine_ls_matrix_type            full 
_refine_ls_weighting_scheme       calc  
_refine_ls_weighting_details 
 'calc w=1/[\s^2^(Fo^2^)+(0.0804P)^2^+27.5274P] where P=(Fo^2^+2Fc^2^)/3' 
_atom_sites_solution_primary      direct 
_atom_sites_solution_secondary    difmap 
_atom_sites_solution_hydrogens    geom 
_refine_ls_hydrogen_treatment     constr 
_refine_ls_extinction_method      none 
_refine_ls_extinction_coef        ? 
_refine_ls_number_reflns          13549 
_refine_ls_number_parameters      970 
_refine_ls_number_restraints      533 
_refine_ls_R_factor_all           0.1332 
_refine_ls_R_factor_gt            0.0841 
_refine_ls_wR_factor_ref          0.2292 
_refine_ls_wR_factor_gt           0.1988 
_refine_ls_goodness_of_fit_ref    1.019 
_refine_ls_restrained_S_all       1.047 
_refine_ls_shift/su_max           0.013 
_refine_ls_shift/su_mean          0.000 
 
loop_ 
 _atom_site_label 
 _atom_site_type_symbol 
 _atom_site_fract_x 
 _atom_site_fract_y 
 _atom_site_fract_z 
 _atom_site_U_iso_or_equiv 
 _atom_site_adp_type 
 _atom_site_occupancy 
 _atom_site_symmetry_multiplicity 
 _atom_site_calc_flag 
 _atom_site_refinement_flags 
 _atom_site_disorder_assembly 
 _atom_site_disorder_group 
Co1 Co 0.55953(3) 0.02731(5) 0.76498(3) 0.0368(2) Uani 1 1 d . B . 
S1 S 0.59389(19) -0.0531(2) 1.16683(16) 0.0447(10) Uani 0.614(8) 1 d PD A 1 
C1 C 0.6208(11) -0.0957(17) 1.2440(7) 0.047(3) Uani 0.614(8) 1 d PD A 1 
H1 H 0.6032 -0.0811 1.2740 0.056 Uiso 0.614(8) 1 calc PR A 1 
C2 C 0.6698(15) -0.152(2) 1.2558(11) 0.057(4) Uani 0.614(8) 1 d PD A 1 
H2 H 0.6912 -0.1820 1.2953 0.068 Uiso 0.614(8) 1 calc PR A 1 
C3 C 0.6864(16) -0.162(2) 1.1989(13) 0.061(2) Uani 0.614(8) 1 d PD A 1 
H3 H 0.7232 -0.1933 1.1996 0.074 Uiso 0.614(8) 1 calc PR A 1 
C4 C 0.6428(13) -0.1202(16) 1.1473(9) 0.036(5) Uani 0.614(8) 1 d PD A 1 
S1D S 0.6913(6) -0.1788(7) 1.2090(5) 0.061(2) Uani 0.386(8) 1 d PD A 2 
C1D C 0.654(3) -0.144(4) 1.2568(18) 0.057(4) Uani 0.386(8) 1 d PD A 2 
H1D H 0.6648 -0.1633 1.2995 0.068 Uiso 0.386(8) 1 calc PR A 2 
C2D C 0.608(2) -0.085(3) 1.2267(14) 0.047(3) Uani 0.386(8) 1 d PD A 2 
H2D H 0.5843 -0.0546 1.2462 0.056 Uiso 0.386(8) 1 calc PR A 2 
C3D C 0.5982(14) -0.0736(18) 1.1577(13) 0.0447(10) Uani 0.386(8) 1 d PD A 2 
H3D H 0.5600 -0.0478 1.1239 0.054 Uiso 0.386(8) 1 calc PR A 2 
C4D C 0.651(2) -0.105(3) 1.1507(16) 0.036(5) Uani 0.386(8) 1 d PD A 2 
S2 S 0.59377(7) -0.05692(9) 1.02043(7) 0.0399(3) Uani 1 1 d . A . 
O1 O 0.66649(17) -0.0537(2) 0.88175(16) 0.0351(8) Uani 1 1 d . B . 
O2 O 0.54819(17) -0.0933(2) 0.85808(16) 0.0377(9) Uani 1 1 d . B . 
O3 O 0.59310(17) 0.0444(2) 0.90482(16) 0.0353(8) Uani 1 1 d . B . 
N1 N 0.5675(2) 0.0838(3) 0.8452(2) 0.0339(10) Uani 1 1 d . B . 
N2 N 0.5276(2) 0.1406(3) 0.7347(2) 0.0421(11) Uani 1 1 d . . . 
N3 N 0.6493(2) -0.0241(3) 0.8195(2) 0.0363(10) Uani 1 1 d . . . 
N4 N 0.6119(2) 0.0401(3) 0.7118(2) 0.0412(11) Uani 1 1 d . . . 
N5 N 0.5194(2) -0.0654(3) 0.7942(2) 0.0379(11) Uani 1 1 d . . . 
N6 N 0.4840(2) -0.0130(3) 0.6835(2) 0.0429(12) Uani 1 1 d . . . 
B1 B 0.6090(3) -0.0443(4) 0.9008(3) 0.0346(14) Uani 1 1 d . . . 
C5 C 0.6516(3) -0.1096(3) 1.0873(3) 0.0397(13) Uani 1 1 d . . . 
C6 C 0.7010(3) -0.1426(4) 1.0730(3) 0.0468(15) Uani 1 1 d . A . 
H6A H 0.7378 -0.1743 1.1031 0.056 Uiso 1 1 calc R . . 
C7 C 0.6918(3) -0.1248(4) 1.0087(3) 0.0435(14) Uani 1 1 d . . . 
H7A H 0.7219 -0.1440 0.9917 0.052 Uiso 1 1 calc R A . 
C8 C 0.6363(2) -0.0782(3) 0.9733(2) 0.0325(11) Uani 1 1 d . A . 
C9 C 0.5527(3) 0.1613(4) 0.8433(3) 0.0376(13) Uani 1 1 d . . . 
C10 C 0.5284(3) 0.1952(4) 0.7769(3) 0.0394(13) Uani 1 1 d . B . 
C11 C 0.5630(3) 0.2107(3) 0.9017(3) 0.0378(13) Uani 1 1 d . B . 
C12 C 0.5455(3) 0.1805(4) 0.9494(3) 0.0431(14) Uani 1 1 d . . . 
H12A H 0.5269 0.1271 0.9450 0.052 Uiso 1 1 calc R B . 
C13 C 0.5547(3) 0.2274(4) 1.0032(3) 0.0496(15) Uani 1 1 d . B . 
H13A H 0.5428 0.2058 1.0355 0.060 Uiso 1 1 calc R . . 
C14 C 0.5812(3) 0.3053(4) 1.0102(3) 0.0540(16) Uani 1 1 d . . . 
H14A H 0.5862 0.3378 1.0466 0.065 Uiso 1 1 calc R B . 
C15 C 0.6004(3) 0.3358(4) 0.9643(3) 0.0508(15) Uani 1 1 d . B . 
H15A H 0.6197 0.3889 0.9697 0.061 Uiso 1 1 calc R . . 
C16 C 0.5915(3) 0.2892(4) 0.9104(3) 0.0437(14) Uani 1 1 d . . . 
H16A H 0.6049 0.3107 0.8790 0.052 Uiso 1 1 calc R B . 
C17 C 0.5075(3) 0.2816(4) 0.7608(3) 0.0443(14) Uani 1 1 d . . . 
C18 C 0.4618(3) 0.3184(4) 0.7801(3) 0.0467(15) Uani 1 1 d . B . 
H18A H 0.4392 0.2865 0.7995 0.056 Uiso 1 1 calc R . . 
C19 C 0.4494(3) 0.4022(4) 0.7708(3) 0.0545(17) Uani 1 1 d . . . 
H19A H 0.4192 0.4277 0.7851 0.065 Uiso 1 1 calc R B . 
C20 C 0.4804(4) 0.4479(4) 0.7411(3) 0.0571(17) Uani 1 1 d . B . 
H20A H 0.4719 0.5050 0.7350 0.069 Uiso 1 1 calc R . . 
C21 C 0.5240(3) 0.4109(4) 0.7203(3) 0.0569(17) Uani 1 1 d . . . 
H21A H 0.5450 0.4427 0.6992 0.068 Uiso 1 1 calc R B . 
C22 C 0.5377(3) 0.3286(4) 0.7294(3) 0.0507(16) Uani 1 1 d . B . 
H22A H 0.5676 0.3038 0.7145 0.061 Uiso 1 1 calc R . . 
C23 C 0.6966(3) -0.0259(3) 0.7990(3) 0.0374(12) Uani 1 1 d . B . 
C24 C 0.6737(3) 0.0122(4) 0.7338(3) 0.0399(13) Uani 1 1 d . B . 
C25 C 0.7658(3) -0.0588(4) 0.8366(3) 0.0394(13) Uani 1 1 d . . . 
C26 C 0.7757(3) -0.1405(4) 0.8534(3) 0.0554(16) Uani 1 1 d . B . 
H26A H 0.7377 -0.1754 0.8437 0.067 Uiso 1 1 calc R . . 
C27 C 0.8414(4) -0.1715(5) 0.8846(3) 0.0620(19) Uani 1 1 d . . . 
H27A H 0.8480 -0.2283 0.8943 0.074 Uiso 1 1 calc R B . 
C28 C 0.8966(3) -0.1212(5) 0.9016(3) 0.0616(19) Uani 1 1 d . B . 
H28A H 0.9413 -0.1426 0.9242 0.074 Uiso 1 1 calc R . . 
C29 C 0.8870(3) -0.0402(5) 0.8859(3) 0.0547(17) Uani 1 1 d . . . 
H29A H 0.9253 -0.0052 0.8977 0.066 Uiso 1 1 calc R B . 
C30 C 0.8221(3) -0.0083(4) 0.8529(3) 0.0449(14) Uani 1 1 d . B . 
H30A H 0.8161 0.0480 0.8414 0.054 Uiso 1 1 calc R . . 
C31 C 0.7179(3) 0.0163(4) 0.6998(3) 0.0436(14) Uani 1 1 d . . . 
C32 C 0.7529(3) -0.0517(5) 0.6961(3) 0.0563(17) Uani 1 1 d . B . 
H32A H 0.7475 -0.1020 0.7143 0.068 Uiso 1 1 calc R . . 
C33 C 0.7957(4) -0.0478(6) 0.6663(4) 0.075(2) Uani 1 1 d . . . 
H33A H 0.8190 -0.0957 0.6636 0.090 Uiso 1 1 calc R B . 
C34 C 0.8053(4) 0.0232(7) 0.6408(4) 0.083(3) Uani 1 1 d . B . 
H34A H 0.8352 0.0250 0.6207 0.099 Uiso 1 1 calc R . . 
C35 C 0.7709(4) 0.0939(6) 0.6441(3) 0.074(2) Uani 1 1 d . . . 
H35A H 0.7777 0.1442 0.6269 0.089 Uiso 1 1 calc R B . 
C36 C 0.7264(3) 0.0897(5) 0.6731(3) 0.0575(18) Uani 1 1 d . B . 
H36A H 0.7018 0.1369 0.6746 0.069 Uiso 1 1 calc R . . 
C37 C 0.4697(3) -0.1093(4) 0.7510(3) 0.0397(13) Uani 1 1 d . B . 
C38 C 0.4464(3) -0.0745(4) 0.6850(3) 0.0444(14) Uani 1 1 d . B . 
C39 C 0.4390(3) -0.1836(4) 0.7629(3) 0.0448(14) Uani 1 1 d . . . 
C40 C 0.4166(3) -0.1864(4) 0.8113(3) 0.0506(15) Uani 1 1 d . B . 
H40A H 0.4234 -0.1407 0.8392 0.061 Uiso 1 1 calc R . . 
C41 C 0.3845(3) -0.2553(4) 0.8189(3) 0.0595(18) Uani 1 1 d . . . 
H41A H 0.3688 -0.2562 0.8517 0.071 Uiso 1 1 calc R B . 
C42 C 0.3747(3) -0.3236(5) 0.7795(4) 0.067(2) Uani 1 1 d . B . 
H42A H 0.3526 -0.3708 0.7853 0.080 Uiso 1 1 calc R . . 
C43 C 0.3975(3) -0.3219(5) 0.7321(4) 0.0644(19) Uani 1 1 d . . . 
H43A H 0.3910 -0.3683 0.7049 0.077 Uiso 1 1 calc R B . 
C44 C 0.4297(3) -0.2533(4) 0.7237(3) 0.0534(16) Uani 1 1 d . B . 
H44A H 0.4458 -0.2532 0.6912 0.064 Uiso 1 1 calc R . . 
C45 C 0.3865(3) -0.1056(4) 0.6278(3) 0.0512(16) Uani 1 1 d . . . 
C46 C 0.3254(3) -0.1167(6) 0.6318(3) 0.082(3) Uani 1 1 d . B . 
H46A H 0.3223 -0.1047 0.6712 0.098 Uiso 1 1 calc R . . 
C47 C 0.2687(4) -0.1457(7) 0.5776(4) 0.101(4) Uani 1 1 d . . . 
H47A H 0.2271 -0.1548 0.5804 0.121 Uiso 1 1 calc R B . 
C48 C 0.2726(4) -0.1610(6) 0.5205(4) 0.081(3) Uani 1 1 d . B . 
H48A H 0.2332 -0.1787 0.4835 0.098 Uiso 1 1 calc R . . 
C49 C 0.3329(3) -0.1511(5) 0.5158(3) 0.0640(19) Uani 1 1 d . . . 
H49A H 0.3356 -0.1636 0.4763 0.077 Uiso 1 1 calc R B . 
C50 C 0.3898(3) -0.1227(4) 0.5696(3) 0.0508(16) Uani 1 1 d . B . 
H50A H 0.4313 -0.1149 0.5665 0.061 Uiso 1 1 calc R . . 
B2 B 0.5078(4) 0.0907(6) 0.6262(4) 0.0342(10) Uani 0.695(2) 1 d PDU B 1 
O4 O 0.5017(3) 0.1587(3) 0.6669(3) 0.0334(10) Uani 0.695(2) 1 d PDU B 1 
O5 O 0.5815(3) 0.0672(3) 0.6484(3) 0.0324(10) Uani 0.695(2) 1 d PDU B 1 
O6 O 0.4647(3) 0.0186(3) 0.6240(3) 0.0328(10) Uani 0.695(2) 1 d PDU B 1 
S3 S 0.48689(11) 0.20995(13) 0.52066(10) 0.0437(4) Uani 0.695(2) 1 d PDU B 1 
C51 C 0.4785(4) 0.1171(5) 0.5518(3) 0.0389(10) Uani 0.695(2) 1 d PDU B 1 
C52 C 0.4435(4) 0.0656(5) 0.4989(4) 0.0479(11) Uani 0.695(2) 1 d PDU B 1 
H52 H 0.4326 0.0106 0.5041 0.058 Uiso 0.695(2) 1 calc PR B 1 
C53 C 0.4253(4) 0.1011(5) 0.4371(4) 0.0500(11) Uani 0.695(2) 1 d PDU B 1 
H53 H 0.4017 0.0721 0.3973 0.060 Uiso 0.695(2) 1 calc PR B 1 
C54 C 0.4445(4) 0.1800(5) 0.4396(4) 0.0494(10) Uani 0.695(2) 1 d PDU B 1 
S4 S 0.41344(14) 0.19315(19) 0.31161(16) 0.0710(6) Uani 0.695(2) 1 d PDU B 1 
C55 C 0.4332(5) 0.2308(8) 0.3842(4) 0.0572(9) Uani 0.695(2) 1 d PDU B 1 
C56 C 0.4369(5) 0.3302(7) 0.3927(6) 0.0710(6) Uani 0.695(2) 1 d PDU B 1 
H56 H 0.4461 0.3657 0.4285 0.085 Uiso 0.695(2) 1 calc PR B 1 
C57 C 0.4196(4) 0.3444(7) 0.3194(5) 0.0638(9) Uani 0.695(2) 1 d PDU B 1 
H57 H 0.4174 0.3988 0.3040 0.077 Uiso 0.695(2) 1 calc PR B 1 
C58 C 0.4061(5) 0.2733(6) 0.2718(5) 0.0638(9) Uani 0.695(2) 1 d PDU B 1 
H58 H 0.3953 0.2772 0.2267 0.077 Uiso 0.695(2) 1 calc PR B 1 
B2D B 0.5151(9) 0.1187(10) 0.6359(7) 0.0342(10) Uani 0.305(2) 1 d PDU B 2 
O4D O 0.5111(8) 0.1824(9) 0.6805(7) 0.0334(10) Uani 0.305(2) 1 d PDU B 2 
O5D O 0.5874(7) 0.0935(9) 0.6549(8) 0.0324(10) Uani 0.305(2) 1 d PDU B 2 
O6D O 0.4693(8) 0.0480(8) 0.6284(8) 0.0328(10) Uani 0.305(2) 1 d PDU B 2 
S3D S 0.4771(2) 0.1229(3) 0.4955(2) 0.0437(4) Uani 0.305(2) 1 d PDU B 2 
C51D C 0.4894(7) 0.1650(8) 0.5682(6) 0.0389(10) Uani 0.305(2) 1 d PDU B 2 
C52D C 0.4743(7) 0.2495(9) 0.5578(7) 0.0479(11) Uani 0.305(2) 1 d PDU B 2 
H52D H 0.4776 0.2855 0.5918 0.058 Uiso 0.305(2) 1 calc PR B 2 
C53D C 0.4538(8) 0.2764(9) 0.4927(7) 0.0500(11) Uani 0.305(2) 1 d PDU B 2 
H53D H 0.4425 0.3314 0.4787 0.060 Uiso 0.305(2) 1 calc PR B 2 
C54D C 0.4522(7) 0.2119(8) 0.4516(6) 0.0494(10) Uani 0.305(2) 1 d PDU B 2 
S4D S 0.4305(4) 0.3210(5) 0.3663(4) 0.0710(6) Uani 0.305(2) 1 d PDU B 2 
C55D C 0.4346(8) 0.2243(12) 0.3848(8) 0.0572(9) Uani 0.305(2) 1 d PDU B 2 
C56D C 0.4230(9) 0.1506(11) 0.3372(10) 0.0710(6) Uani 0.305(2) 1 d PDU B 2 
H56D H 0.4251 0.0934 0.3452 0.085 Uiso 0.305(2) 1 calc PR B 2 
C57D C 0.4053(9) 0.2029(12) 0.2673(9) 0.0638(9) Uani 0.305(2) 1 d PDU B 2 
H57D H 0.3946 0.1815 0.2252 0.077 Uiso 0.305(2) 1 calc PR B 2 
C58D C 0.4107(8) 0.2945(12) 0.2886(8) 0.0638(9) Uani 0.305(2) 1 d PDU B 2 
H58D H 0.4027 0.3362 0.2571 0.077 Uiso 0.305(2) 1 calc PR B 2 
N7 N 0.7071(2) 0.6424(3) 0.4613(2) 0.0440(12) Uani 1 1 d . . . 
C59 C 0.6763(3) 0.7256(4) 0.4360(3) 0.0537(16) Uani 1 1 d D D . 
H59A H 0.6450 0.7205 0.3891 0.064 Uiso 1 1 calc R . . 
H59B H 0.6487 0.7422 0.4589 0.064 Uiso 1 1 calc R . . 
C60 C 0.7269(3) 0.7930(4) 0.4441(4) 0.076(2) Uani 1 1 d D . . 
H60A H 0.7633 0.7918 0.4894 0.091 Uiso 1 1 calc R C 1 
H60B H 0.7482 0.7822 0.4144 0.091 Uiso 1 1 calc R C 1 
C61 C 0.6954(15) 0.8763(10) 0.4301(17) 0.081(4) Uani 0.532(11) 1 d PD D 1 
H61A H 0.7206 0.9126 0.4135 0.097 Uiso 0.532(11) 1 calc PR D 1 
H61B H 0.6475 0.8730 0.3968 0.097 Uiso 0.532(11) 1 calc PR D 1 
C62 C 0.6989(9) 0.9077(10) 0.4908(8) 0.093(4) Uani 0.532(11) 1 d PD D 1 
H62A H 0.6831 0.9646 0.4847 0.140 Uiso 0.532(11) 1 calc PR D 1 
H62B H 0.7460 0.9053 0.5245 0.140 Uiso 0.532(11) 1 calc PR D 1 
H62C H 0.6699 0.8746 0.5043 0.140 Uiso 0.532(11) 1 calc PR D 1 
C61D C 0.6902(16) 0.8735(10) 0.434(2) 0.081(4) Uani 0.468(11) 1 d PD D 2 
H61C H 0.6563 0.8774 0.3879 0.097 Uiso 0.468(11) 1 calc PR D 2 
H61D H 0.6650 0.8741 0.4612 0.097 Uiso 0.468(11) 1 calc PR D 2 
C62D C 0.7334(10) 0.9444(11) 0.4499(10) 0.093(4) Uani 0.468(11) 1 d PD D 2 
H62D H 0.7054 0.9939 0.4401 0.140 Uiso 0.468(11) 1 calc PR D 2 
H62E H 0.7593 0.9441 0.4240 0.140 Uiso 0.468(11) 1 calc PR D 2 
H62F H 0.7650 0.9435 0.4964 0.140 Uiso 0.468(11) 1 calc PR D 2 
C63 C 0.7524(3) 0.6146(4) 0.4299(3) 0.0502(15) Uani 1 1 d . . . 
H63A H 0.7896 0.6548 0.4408 0.060 Uiso 1 1 calc R . . 
H63B H 0.7733 0.5617 0.4496 0.060 Uiso 1 1 calc R . . 
C64 C 0.7169(3) 0.6045(4) 0.3563(3) 0.0531(16) Uani 1 1 d . . . 
H64A H 0.6822 0.5607 0.3446 0.064 Uiso 1 1 calc R . . 
H64B H 0.6936 0.6560 0.3358 0.064 Uiso 1 1 calc R . . 
C65 C 0.7686(3) 0.5827(5) 0.3314(3) 0.069(2) Uani 1 1 d . . . 
H65A H 0.8024 0.6275 0.3429 0.083 Uiso 1 1 calc R . . 
H65B H 0.7931 0.5327 0.3542 0.083 Uiso 1 1 calc R . . 
C66 C 0.7392(4) 0.5682(6) 0.2594(4) 0.076(2) Uani 1 1 d . . . 
H66A H 0.7760 0.5571 0.2469 0.114 Uiso 1 1 calc R . . 
H66B H 0.7140 0.6169 0.2362 0.114 Uiso 1 1 calc R . . 
H66C H 0.7083 0.5212 0.2478 0.114 Uiso 1 1 calc R . . 
C67 C 0.6478(3) 0.5850(4) 0.4463(3) 0.0493(15) Uani 1 1 d . . . 
H67A H 0.6159 0.5907 0.3995 0.059 Uiso 1 1 calc R . . 
H67B H 0.6233 0.6027 0.4719 0.059 Uiso 1 1 calc R . . 
C68 C 0.6660(3) 0.4953(4) 0.4605(3) 0.0553(17) Uani 1 1 d . . . 
H68A H 0.6942 0.4877 0.5079 0.066 Uiso 1 1 calc R . . 
H68B H 0.6928 0.4773 0.4374 0.066 Uiso 1 1 calc R . . 
C69 C 0.6015(3) 0.4434(4) 0.4384(3) 0.0579(17) Uani 1 1 d . . . 
H69A H 0.5772 0.4574 0.4650 0.069 Uiso 1 1 calc R . . 
H69B H 0.5710 0.4557 0.3922 0.069 Uiso 1 1 calc R . . 
C70 C 0.6187(4) 0.3532(5) 0.4456(4) 0.066(2) Uani 1 1 d . . . 
H70A H 0.5775 0.3213 0.4363 0.100 Uiso 1 1 calc R . . 
H70B H 0.6528 0.3420 0.4902 0.100 Uiso 1 1 calc R . . 
H70C H 0.6370 0.3378 0.4148 0.100 Uiso 1 1 calc R . . 
C71 C 0.7538(3) 0.6445(4) 0.5346(3) 0.0467(15) Uani 1 1 d . . . 
H71A H 0.7694 0.5879 0.5491 0.056 Uiso 1 1 calc R . . 
H71B H 0.7946 0.6772 0.5416 0.056 Uiso 1 1 calc R . . 
C72 C 0.7235(3) 0.6790(4) 0.5780(3) 0.0488(15) Uani 1 1 d . . . 
H72A H 0.7013 0.7321 0.5604 0.059 Uiso 1 1 calc R . . 
H72B H 0.6886 0.6409 0.5789 0.059 Uiso 1 1 calc R . . 
C73 C 0.7794(3) 0.6905(4) 0.6464(3) 0.0515(15) Uani 1 1 d . . . 
H73A H 0.8025 0.6374 0.6625 0.062 Uiso 1 1 calc R . . 
H73B H 0.8135 0.7293 0.6448 0.062 Uiso 1 1 calc R . . 
C74 C 0.7540(3) 0.7221(4) 0.6934(3) 0.0619(18) Uani 1 1 d . . . 
H74A H 0.7927 0.7341 0.7353 0.093 Uiso 1 1 calc R . . 
H74B H 0.7250 0.6807 0.6997 0.093 Uiso 1 1 calc R . . 
H74C H 0.7275 0.7721 0.6759 0.093 Uiso 1 1 calc R . . 
C1S C 0.9210(3) 0.1287(4) 0.4900(3) 0.0512(16) Uani 1 1 d . . . 
C2S C 0.9175(3) 0.1979(4) 0.5227(4) 0.0558(17) Uani 1 1 d . . . 
H2SA H 0.9057 0.2485 0.5000 0.067 Uiso 1 1 calc R . . 
C3S C 0.9306(3) 0.1957(4) 0.5874(4) 0.0579(17) Uani 1 1 d . . . 
H3SA H 0.9275 0.2443 0.6087 0.070 Uiso 1 1 calc R . . 
C4S C 0.9481(3) 0.1236(5) 0.6209(3) 0.0576(17) Uani 1 1 d . . . 
H4SA H 0.9575 0.1217 0.6657 0.069 Uiso 1 1 calc R . . 
C5S C 0.9519(3) 0.0536(4) 0.5890(4) 0.0590(17) Uani 1 1 d . . . 
H5SA H 0.9643 0.0033 0.6121 0.071 Uiso 1 1 calc R . . 
C6S C 0.9382(3) 0.0554(4) 0.5250(3) 0.0534(16) Uani 1 1 d . . . 
H6SA H 0.9403 0.0062 0.5037 0.064 Uiso 1 1 calc R . . 
C7S C 0.9077(4) 0.1309(6) 0.4194(3) 0.081(2) Uani 1 1 d . . . 
H7SA H 0.8723 0.0910 0.3946 0.121 Uiso 1 1 calc R . . 
H7SB H 0.9496 0.1173 0.4158 0.121 Uiso 1 1 calc R . . 
H7SC H 0.8925 0.1858 0.4017 0.121 Uiso 1 1 calc R . . 
 
loop_ 
 _atom_site_aniso_label 
 _atom_site_aniso_U_11 
 _atom_site_aniso_U_22 
 _atom_site_aniso_U_33 
 _atom_site_aniso_U_23 
 _atom_site_aniso_U_13 
 _atom_site_aniso_U_12 
Co1 0.0270(4) 0.0502(5) 0.0318(4) 0.0048(3) 0.0115(3) 0.0012(3) 
S1 0.0341(13) 0.063(3) 0.0391(16) -0.0015(14) 0.0181(11) 0.0041(14) 
C1 0.034(10) 0.075(10) 0.028(9) 0.022(8) 0.009(9) 0.006(6) 
C2 0.040(15) 0.083(9) 0.051(4) 0.023(5) 0.023(6) 0.010(7) 
C3 0.056(3) 0.079(6) 0.052(4) 0.029(3) 0.026(3) 0.017(3) 
C4 0.029(7) 0.041(11) 0.037(4) 0.001(5) 0.011(4) -0.016(8) 
S1D 0.056(3) 0.079(6) 0.052(4) 0.029(3) 0.026(3) 0.017(3) 
C1D 0.040(15) 0.083(9) 0.051(4) 0.023(5) 0.023(6) 0.010(7) 
C2D 0.034(10) 0.075(10) 0.028(9) 0.022(8) 0.009(9) 0.006(6) 
C3D 0.0341(13) 0.063(3) 0.0391(16) -0.0015(14) 0.0181(11) 0.0041(14) 
C4D 0.029(7) 0.041(11) 0.037(4) 0.001(5) 0.011(4) -0.016(8) 
S2 0.0301(7) 0.0498(9) 0.0378(7) 0.0067(6) 0.0128(6) 0.0046(6) 
O1 0.0284(18) 0.043(2) 0.0312(18) 0.0071(16) 0.0105(15) 0.0020(16) 
O2 0.033(2) 0.046(2) 0.0302(19) 0.0016(16) 0.0095(16) -0.0055(17) 
O3 0.0318(19) 0.040(2) 0.0321(19) 0.0048(16) 0.0116(15) -0.0002(16) 
N1 0.028(2) 0.037(3) 0.034(2) 0.0085(19) 0.0118(19) 0.0029(19) 
N2 0.038(3) 0.053(3) 0.038(3) 0.015(2) 0.019(2) 0.009(2) 
N3 0.030(2) 0.045(3) 0.032(2) 0.002(2) 0.0119(19) -0.005(2) 
N4 0.031(2) 0.057(3) 0.031(2) 0.008(2) 0.0097(19) 0.003(2) 
N5 0.028(2) 0.051(3) 0.032(2) -0.003(2) 0.0102(19) -0.003(2) 
N6 0.032(2) 0.063(3) 0.029(2) 0.006(2) 0.009(2) 0.007(2) 
B1 0.031(3) 0.038(4) 0.033(3) 0.001(3) 0.012(3) -0.004(3) 
C5 0.032(3) 0.040(3) 0.042(3) 0.006(2) 0.011(2) -0.003(2) 
C6 0.035(3) 0.056(4) 0.043(3) 0.013(3) 0.011(3) 0.008(3) 
C7 0.035(3) 0.051(4) 0.046(3) 0.005(3) 0.018(3) 0.005(3) 
C8 0.024(3) 0.034(3) 0.037(3) -0.003(2) 0.011(2) -0.004(2) 
C9 0.027(3) 0.046(4) 0.040(3) 0.001(3) 0.015(2) -0.004(2) 
C10 0.027(3) 0.045(3) 0.048(3) 0.016(3) 0.018(2) 0.005(2) 
C11 0.027(3) 0.039(3) 0.045(3) 0.006(2) 0.013(2) 0.005(2) 
C12 0.040(3) 0.042(3) 0.050(3) 0.001(3) 0.022(3) 0.003(3) 
C13 0.050(4) 0.054(4) 0.048(3) 0.004(3) 0.024(3) 0.008(3) 
C14 0.057(4) 0.051(4) 0.049(4) -0.007(3) 0.019(3) 0.013(3) 
C15 0.039(3) 0.044(4) 0.063(4) 0.004(3) 0.016(3) 0.004(3) 
C16 0.032(3) 0.047(4) 0.051(3) 0.008(3) 0.017(3) 0.007(3) 
C17 0.034(3) 0.053(4) 0.049(3) 0.017(3) 0.021(3) 0.007(3) 
C18 0.030(3) 0.065(4) 0.044(3) 0.013(3) 0.014(3) 0.012(3) 
C19 0.041(3) 0.069(5) 0.047(4) 0.005(3) 0.013(3) 0.017(3) 
C20 0.066(4) 0.046(4) 0.048(4) 0.008(3) 0.014(3) 0.009(3) 
C21 0.061(4) 0.061(4) 0.051(4) 0.013(3) 0.027(3) 0.001(3) 
C22 0.048(4) 0.055(4) 0.055(4) 0.017(3) 0.027(3) 0.012(3) 
C23 0.029(3) 0.044(3) 0.036(3) 0.002(2) 0.011(2) -0.001(2) 
C24 0.031(3) 0.051(4) 0.037(3) -0.001(3) 0.015(2) -0.002(3) 
C25 0.037(3) 0.049(3) 0.035(3) 0.004(3) 0.018(2) 0.005(3) 
C26 0.052(4) 0.056(4) 0.058(4) 0.004(3) 0.024(3) 0.001(3) 
C27 0.067(5) 0.059(4) 0.057(4) 0.022(3) 0.023(4) 0.024(4) 
C28 0.043(4) 0.082(5) 0.057(4) 0.015(4) 0.019(3) 0.017(4) 
C29 0.034(3) 0.076(5) 0.050(4) 0.001(3) 0.015(3) -0.001(3) 
C30 0.034(3) 0.055(4) 0.046(3) 0.006(3) 0.017(3) 0.006(3) 
C31 0.028(3) 0.066(4) 0.034(3) 0.004(3) 0.011(2) -0.001(3) 
C32 0.056(4) 0.071(5) 0.047(4) -0.009(3) 0.028(3) 0.002(3) 
C33 0.060(5) 0.118(7) 0.057(4) -0.012(5) 0.035(4) 0.011(5) 
C34 0.043(4) 0.162(9) 0.050(4) 0.001(5) 0.027(3) -0.002(5) 
C35 0.044(4) 0.128(7) 0.048(4) 0.015(4) 0.018(3) -0.018(5) 
C36 0.045(4) 0.084(5) 0.043(3) 0.015(3) 0.019(3) -0.001(3) 
C37 0.029(3) 0.053(4) 0.039(3) -0.005(3) 0.016(2) -0.005(3) 
C38 0.024(3) 0.070(4) 0.039(3) -0.003(3) 0.014(2) -0.003(3) 
C39 0.025(3) 0.061(4) 0.042(3) -0.004(3) 0.009(2) -0.006(3) 
C40 0.040(3) 0.060(4) 0.048(4) -0.004(3) 0.016(3) -0.010(3) 
C41 0.047(4) 0.064(5) 0.065(4) 0.004(4) 0.022(3) -0.014(3) 
C42 0.048(4) 0.061(5) 0.074(5) 0.003(4) 0.010(4) -0.015(3) 
C43 0.048(4) 0.059(5) 0.073(5) -0.014(4) 0.014(4) -0.010(3) 
C44 0.037(3) 0.065(4) 0.050(4) -0.013(3) 0.011(3) -0.002(3) 
C45 0.029(3) 0.080(5) 0.039(3) -0.003(3) 0.010(3) -0.003(3) 
C46 0.032(3) 0.164(9) 0.045(4) 0.000(5) 0.013(3) -0.010(4) 
C47 0.033(4) 0.204(11) 0.053(5) 0.006(6) 0.006(3) -0.032(5) 
C48 0.049(4) 0.128(7) 0.048(4) -0.001(4) 0.003(3) -0.029(5) 
C49 0.055(4) 0.077(5) 0.043(4) -0.003(3) 0.006(3) -0.010(4) 
C50 0.032(3) 0.076(5) 0.037(3) -0.004(3) 0.008(3) -0.003(3) 
B2 0.0329(16) 0.034(2) 0.0323(15) -0.0028(15) 0.0113(14) -0.0041(18) 
O4 0.034(2) 0.032(2) 0.0291(19) -0.0010(17) 0.0092(17) -0.003(2) 
O5 0.0319(16) 0.034(3) 0.0289(17) -0.001(2) 0.0113(14) -0.006(2) 
O6 0.0317(17) 0.032(2) 0.0308(17) -0.002(2) 0.0101(14) -0.004(2) 
S3 0.0434(10) 0.0457(10) 0.0372(9) -0.0013(7) 0.0131(8) -0.0065(8) 
C51 0.0373(18) 0.0409(19) 0.0360(15) -0.0015(15) 0.0138(15) -0.0039(18) 
C52 0.047(2) 0.0459(19) 0.0404(18) -0.0007(16) 0.0094(18) -0.0047(19) 
C53 0.045(2) 0.0512(19) 0.0434(18) 0.0013(16) 0.0102(18) -0.0026(19) 
C54 0.0388(17) 0.0583(18) 0.0517(15) 0.0055(14) 0.0205(15) 0.0007(17) 
S4 0.0562(10) 0.0753(12) 0.0806(12) 0.0167(11) 0.0290(10) 0.0053(10) 
C55 0.0434(15) 0.0693(16) 0.0646(14) 0.0132(14) 0.0289(14) 0.0030(15) 
C56 0.0562(10) 0.0753(12) 0.0806(12) 0.0167(11) 0.0290(10) 0.0053(10) 
C57 0.0475(14) 0.0750(16) 0.0749(14) 0.0107(14) 0.0324(14) 0.0064(15) 
C58 0.0475(14) 0.0750(16) 0.0749(14) 0.0107(14) 0.0324(14) 0.0064(15) 
B2D 0.0329(16) 0.034(2) 0.0323(15) -0.0028(15) 0.0113(14) -0.0041(18) 
O4D 0.034(2) 0.032(2) 0.0291(19) -0.0010(17) 0.0092(17) -0.003(2) 
O5D 0.0319(16) 0.034(3) 0.0289(17) -0.001(2) 0.0113(14) -0.006(2) 
O6D 0.0317(17) 0.032(2) 0.0308(17) -0.002(2) 0.0101(14) -0.004(2) 
S3D 0.0434(10) 0.0457(10) 0.0372(9) -0.0013(7) 0.0131(8) -0.0065(8) 
C51D 0.0373(18) 0.0409(19) 0.0360(15) -0.0015(15) 0.0138(15) -0.0039(18) 
C52D 0.047(2) 0.0459(19) 0.0404(18) -0.0007(16) 0.0094(18) -0.0047(19) 
C53D 0.045(2) 0.0512(19) 0.0434(18) 0.0013(16) 0.0102(18) -0.0026(19) 
C54D 0.0388(17) 0.0583(18) 0.0517(15) 0.0055(14) 0.0205(15) 0.0007(17) 
S4D 0.0562(10) 0.0753(12) 0.0806(12) 0.0167(11) 0.0290(10) 0.0053(10) 
C55D 0.0434(15) 0.0693(16) 0.0646(14) 0.0132(14) 0.0289(14) 0.0030(15) 
C56D 0.0562(10) 0.0753(12) 0.0806(12) 0.0167(11) 0.0290(10) 0.0053(10) 
C57D 0.0475(14) 0.0750(16) 0.0749(14) 0.0107(14) 0.0324(14) 0.0064(15) 
C58D 0.0475(14) 0.0750(16) 0.0749(14) 0.0107(14) 0.0324(14) 0.0064(15) 
N7 0.025(2) 0.052(3) 0.046(3) 0.003(2) 0.007(2) 0.002(2) 
C59 0.032(3) 0.073(5) 0.047(3) 0.007(3) 0.008(3) 0.015(3) 
C60 0.042(4) 0.062(5) 0.092(6) 0.012(4) -0.001(4) 0.005(3) 
C61 0.073(6) 0.059(5) 0.073(7) 0.001(4) -0.001(5) 0.009(4) 
C62 0.087(9) 0.083(9) 0.086(9) 0.013(7) 0.015(7) 0.027(7) 
C61D 0.073(6) 0.059(5) 0.073(7) 0.001(4) -0.001(5) 0.009(4) 
C62D 0.087(9) 0.083(9) 0.086(9) 0.013(7) 0.015(7) 0.027(7) 
C63 0.031(3) 0.066(4) 0.054(4) 0.006(3) 0.020(3) 0.007(3) 
C64 0.034(3) 0.069(4) 0.053(4) 0.002(3) 0.016(3) 0.003(3) 
C65 0.050(4) 0.103(6) 0.059(4) 0.012(4) 0.029(3) 0.018(4) 
C66 0.064(5) 0.107(6) 0.071(5) 0.013(5) 0.042(4) 0.019(4) 
C67 0.025(3) 0.074(5) 0.045(3) -0.005(3) 0.011(3) -0.007(3) 
C68 0.041(3) 0.071(5) 0.050(4) -0.002(3) 0.016(3) -0.008(3) 
C69 0.040(3) 0.071(5) 0.054(4) 0.003(3) 0.013(3) -0.010(3) 
C70 0.054(4) 0.073(5) 0.072(5) -0.008(4) 0.027(4) -0.017(4) 
C71 0.029(3) 0.052(4) 0.047(3) 0.000(3) 0.006(3) 0.000(3) 
C72 0.037(3) 0.057(4) 0.046(3) 0.008(3) 0.013(3) 0.004(3) 
C73 0.040(3) 0.056(4) 0.050(4) -0.002(3) 0.011(3) 0.001(3) 
C74 0.049(4) 0.064(5) 0.067(4) -0.015(4) 0.020(3) -0.007(3) 
C1S 0.033(3) 0.072(5) 0.048(4) 0.002(3) 0.017(3) -0.004(3) 
C2S 0.046(4) 0.048(4) 0.075(5) 0.012(3) 0.028(3) 0.007(3) 
C3S 0.043(4) 0.057(4) 0.073(5) -0.012(4) 0.024(3) -0.006(3) 
C4S 0.049(4) 0.072(5) 0.053(4) 0.000(4) 0.024(3) -0.010(3) 
C5S 0.063(4) 0.048(4) 0.071(5) 0.011(3) 0.033(4) 0.004(3) 
C6S 0.053(4) 0.044(4) 0.068(4) -0.005(3) 0.032(3) -0.008(3) 
C7S 0.072(5) 0.116(7) 0.056(4) 0.006(4) 0.029(4) 0.003(5) 
 
_geom_special_details 
; 
 All esds (except the esd in the dihedral angle between two l.s. planes) 
 are estimated using the full covariance matrix.  The cell esds are taken 
 into account individually in the estimation of esds in distances, angles 
 and torsion angles; correlations between esds in cell parameters are only 
 used when they are defined by crystal symmetry.  An approximate (isotropic) 
 treatment of cell esds is used for estimating esds involving l.s. planes. 
; 
 
loop_ 
 _geom_bond_atom_site_label_1 
 _geom_bond_atom_site_label_2 
 _geom_bond_distance 
 _geom_bond_site_symmetry_2 
 _geom_bond_publ_flag 
Co1 N6 1.981(5) . ? 
Co1 N1 1.986(4) . ? 
Co1 N3 1.991(4) . ? 
Co1 N2 1.993(5) . ? 
Co1 N5 2.005(5) . ? 
Co1 N4 2.007(4) . ? 
S1 C4 1.719(16) . ? 
S1 C1 1.738(13) . ? 
C1 C2 1.347(13) . ? 
C1 H1 0.9500 . ? 
C2 C3 1.50(3) . ? 
C2 H2 0.9500 . ? 
C3 C4 1.331(17) . ? 
C3 H3 0.9500 . ? 
C4 C5 1.472(13) . ? 
S1D C4D 1.72(2) . ? 
S1D C1D 1.72(2) . ? 
C1D C2D 1.345(16) . ? 
C1D H1D 0.9500 . ? 
C2D C3D 1.50(3) . ? 
C2D H2D 0.9500 . ? 
C3D C4D 1.340(19) . ? 
C3D H3D 0.9500 . ? 
C4D C5 1.45(2) . ? 
S2 C5 1.726(5) . ? 
S2 C8 1.734(5) . ? 
O1 N3 1.385(5) . ? 
O1 B1 1.506(7) . ? 
O2 N5 1.386(5) . ? 
O2 B1 1.490(7) . ? 
O3 N1 1.382(5) . ? 
O3 B1 1.503(7) . ? 
N1 C9 1.304(7) . ? 
N2 C10 1.306(7) . ? 
N2 O4D 1.315(16) . ? 
N2 O4 1.424(8) . ? 
N3 C23 1.307(7) . ? 
N4 C24 1.301(7) . ? 
N4 O5 1.374(8) . ? 
N4 O5D 1.458(17) . ? 
N5 C37 1.315(7) . ? 
N6 C38 1.308(7) . ? 
N6 O6 1.336(8) . ? 
N6 O6D 1.525(16) . ? 
B1 C8 1.590(8) . ? 
C5 C6 1.366(8) . ? 
C6 C7 1.420(8) . ? 
C6 H6A 0.9500 . ? 
C7 C8 1.358(7) . ? 
C7 H7A 0.9500 . ? 
C9 C10 1.476(7) . ? 
C9 C11 1.487(8) . ? 
C10 C17 1.480(8) . ? 
C11 C12 1.391(8) . ? 
C11 C16 1.403(8) . ? 
C12 C13 1.384(8) . ? 
C12 H12A 0.9500 . ? 
C13 C14 1.378(9) . ? 
C13 H13A 0.9500 . ? 
C14 C15 1.379(9) . ? 
C14 H14A 0.9500 . ? 
C15 C16 1.386(8) . ? 
C15 H15A 0.9500 . ? 
C16 H16A 0.9500 . ? 
C17 C18 1.391(8) . ? 
C17 C22 1.395(8) . ? 
C18 C19 1.395(9) . ? 
C18 H18A 0.9500 . ? 
C19 C20 1.370(9) . ? 
C19 H19A 0.9500 . ? 
C20 C21 1.376(9) . ? 
C20 H20A 0.9500 . ? 
C21 C22 1.374(9) . ? 
C21 H21A 0.9500 . ? 
C22 H22A 0.9500 . ? 
C23 C25 1.475(7) . ? 
C23 C24 1.483(7) . ? 
C24 C31 1.479(7) . ? 
C25 C26 1.381(9) . ? 
C25 C30 1.391(8) . ? 
C26 C27 1.389(9) . ? 
C26 H26A 0.9500 . ? 
C27 C28 1.368(10) . ? 
C27 H27A 0.9500 . ? 
C28 C29 1.365(10) . ? 
C28 H28A 0.9500 . ? 
C29 C30 1.383(8) . ? 
C29 H29A 0.9500 . ? 
C30 H30A 0.9500 . ? 
C31 C32 1.372(9) . ? 
C31 C36 1.395(9) . ? 
C32 C33 1.377(9) . ? 
C32 H32A 0.9500 . ? 
C33 C34 1.354(12) . ? 
C33 H33A 0.9500 . ? 
C34 C35 1.398(12) . ? 
C34 H34A 0.9500 . ? 
C35 C36 1.394(9) . ? 
C35 H35A 0.9500 . ? 
C36 H36A 0.9500 . ? 
C37 C39 1.471(8) . ? 
C37 C38 1.475(8) . ? 
C38 C45 1.476(8) . ? 
C39 C40 1.388(8) . ? 
C39 C44 1.407(9) . ? 
C40 C41 1.376(9) . ? 
C40 H40A 0.9500 . ? 
C41 C42 1.388(10) . ? 
C41 H41A 0.9500 . ? 
C42 C43 1.373(10) . ? 
C42 H42A 0.9500 . ? 
C43 C44 1.381(10) . ? 
C43 H43A 0.9500 . ? 
C44 H44A 0.9500 . ? 
C45 C50 1.387(8) . ? 
C45 C46 1.388(9) . ? 
C46 C47 1.396(10) . ? 
C46 H46A 0.9500 . ? 
C47 C48 1.363(11) . ? 
C47 H47A 0.9500 . ? 
C48 C49 1.377(10) . ? 
C48 H48A 0.9500 . ? 
C49 C50 1.389(8) . ? 
C49 H49A 0.9500 . ? 
C50 H50A 0.9500 . ? 
B2 O4 1.489(10) . ? 
B2 O6 1.495(10) . ? 
B2 O5 1.513(9) . ? 
B2 C51 1.588(10) . ? 
S3 C51 1.719(7) . ? 
S3 C54 1.736(8) . ? 
C51 C52 1.393(10) . ? 
C52 C53 1.411(11) . ? 
C52 H52 0.9500 . ? 
C53 C54 1.350(10) . ? 
C53 H53 0.9500 . ? 
C54 C55 1.439(10) . ? 
S4 C58 1.562(10) . ? 
S4 C55 1.636(11) . ? 
C55 C56 1.633(16) . ? 
C56 C57 1.559(15) . ? 
C56 H56 0.9500 . ? 
C57 C58 1.528(14) . ? 
C57 H57 0.9500 . ? 
C58 H58 0.9500 . ? 
B2D O4D 1.485(16) . ? 
B2D O6D 1.489(16) . ? 
B2D O5D 1.501(15) . ? 
B2D C51D 1.584(15) . ? 
S3D C51D 1.703(12) . ? 
S3D C54D 1.715(13) . ? 
C51D C52D 1.417(15) . ? 
C52D C53D 1.418(17) . ? 
C52D H52D 0.9500 . ? 
C53D C54D 1.400(15) . ? 
C53D H53D 0.9500 . ? 
C54D C55D 1.413(15) . ? 
S4D C55D 1.627(17) . ? 
S4D C58D 1.684(15) . ? 
C55D C56D 1.56(2) . ? 
C56D C57D 1.70(2) . ? 
C56D H56D 0.9500 . ? 
C57D C58D 1.56(2) . ? 
C57D H57D 0.9500 . ? 
C58D H58D 0.9500 . ? 
N7 C67 1.513(7) . ? 
N7 C59 1.516(8) . ? 
N7 C63 1.521(7) . ? 
N7 C71 1.530(7) . ? 
C59 C60 1.513(10) . ? 
C59 H59A 0.9900 . ? 
C59 H59B 0.9900 . ? 
C60 C61 1.496(14) . ? 
C60 C61D 1.505(16) . ? 
C60 H60A 0.9900 . ? 
C60 H60B 0.9900 . ? 
C61 C62 1.45(3) . ? 
C61 H61A 0.9900 . ? 
C61 H61B 0.9900 . ? 
C62 H62A 0.9800 . ? 
C62 H62B 0.9800 . ? 
C62 H62C 0.9800 . ? 
C61D C62D 1.44(3) . ? 
C61D H61C 0.9900 . ? 
C61D H61D 0.9900 . ? 
C62D H62D 0.9800 . ? 
C62D H62E 0.9800 . ? 
C62D H62F 0.9800 . ? 
C63 C64 1.518(8) . ? 
C63 H63A 0.9900 . ? 
C63 H63B 0.9900 . ? 
C64 C65 1.511(8) . ? 
C64 H64A 0.9900 . ? 
C64 H64B 0.9900 . ? 
C65 C66 1.498(10) . ? 
C65 H65A 0.9900 . ? 
C65 H65B 0.9900 . ? 
C66 H66A 0.9800 . ? 
C66 H66B 0.9800 . ? 
C66 H66C 0.9800 . ? 
C67 C68 1.517(9) . ? 
C67 H67A 0.9900 . ? 
C67 H67B 0.9900 . ? 
C68 C69 1.527(8) . ? 
C68 H68A 0.9900 . ? 
C68 H68B 0.9900 . ? 
C69 C70 1.513(10) . ? 
C69 H69A 0.9900 . ? 
C69 H69B 0.9900 . ? 
C70 H70A 0.9800 . ? 
C70 H70B 0.9800 . ? 
C70 H70C 0.9800 . ? 
C71 C72 1.520(8) . ? 
C71 H71A 0.9900 . ? 
C71 H71B 0.9900 . ? 
C72 C73 1.514(8) . ? 
C72 H72A 0.9900 . ? 
C72 H72B 0.9900 . ? 
C73 C74 1.498(9) . ? 
C73 H73A 0.9900 . ? 
C73 H73B 0.9900 . ? 
C74 H74A 0.9800 . ? 
C74 H74B 0.9800 . ? 
C74 H74C 0.9800 . ? 
C1S C2S 1.374(9) . ? 
C1S C6S 1.398(9) . ? 
C1S C7S 1.506(9) . ? 
C2S C3S 1.374(9) . ? 
C2S H2SA 0.9500 . ? 
C3S C4S 1.365(10) . ? 
C3S H3SA 0.9500 . ? 
C4S C5S 1.379(9) . ? 
C4S H4SA 0.9500 . ? 
C5S C6S 1.354(9) . ? 
C5S H5SA 0.9500 . ? 
C6S H6SA 0.9500 . ? 
C7S H7SA 0.9800 . ? 
C7S H7SB 0.9800 . ? 
C7S H7SC 0.9800 . ? 
 
loop_ 
 _geom_angle_atom_site_label_1 
 _geom_angle_atom_site_label_2 
 _geom_angle_atom_site_label_3 
 _geom_angle 
 _geom_angle_site_symmetry_1 
 _geom_angle_site_symmetry_3 
 _geom_angle_publ_flag 
N6 Co1 N1 135.97(18) . . ? 
N6 Co1 N3 129.38(19) . . ? 
N1 Co1 N3 87.41(17) . . ? 
N6 Co1 N2 87.8(2) . . ? 
N1 Co1 N2 76.34(18) . . ? 
N3 Co1 N2 135.10(19) . . ? 
N6 Co1 N5 75.76(19) . . ? 
N1 Co1 N5 85.44(18) . . ? 
N3 Co1 N5 85.85(18) . . ? 
N2 Co1 N5 132.84(18) . . ? 
N6 Co1 N4 86.00(19) . . ? 
N1 Co1 N4 131.50(19) . . ? 
N3 Co1 N4 75.88(17) . . ? 
N2 Co1 N4 84.20(19) . . ? 
N5 Co1 N4 136.6(2) . . ? 
C4 S1 C1 91.9(7) . . ? 
C2 C1 S1 111.3(12) . . ? 
C2 C1 H1 124.4 . . ? 
S1 C1 H1 124.4 . . ? 
C1 C2 C3 111.8(12) . . ? 
C1 C2 H2 124.1 . . ? 
C3 C2 H2 124.1 . . ? 
C4 C3 C2 111.1(16) . . ? 
C4 C3 H3 124.5 . . ? 
C2 C3 H3 124.5 . . ? 
C3 C4 C5 123.1(17) . . ? 
C3 C4 S1 112.5(14) . . ? 
C5 C4 S1 120.9(11) . . ? 
C4D S1D C1D 91.9(12) . . ? 
C2D C1D S1D 111.9(18) . . ? 
C2D C1D H1D 124.1 . . ? 
S1D C1D H1D 124.1 . . ? 
C1D C2D C3D 110.6(18) . . ? 
C1D C2D H2D 124.7 . . ? 
C3D C2D H2D 124.7 . . ? 
C4D C3D C2D 110.2(16) . . ? 
C4D C3D H3D 124.9 . . ? 
C2D C3D H3D 124.9 . . ? 
C3D C4D C5 121(2) . . ? 
C3D C4D S1D 110.6(17) . . ? 
C5 C4D S1D 121(2) . . ? 
C5 S2 C8 93.7(3) . . ? 
N3 O1 B1 111.9(4) . . ? 
N5 O2 B1 112.1(4) . . ? 
N1 O3 B1 113.3(4) . . ? 
C9 N1 O3 118.2(4) . . ? 
C9 N1 Co1 120.1(4) . . ? 
O3 N1 Co1 121.6(3) . . ? 
C10 N2 O4D 104.3(7) . . ? 
C10 N2 O4 121.9(5) . . ? 
O4D N2 O4 19.8(6) . . ? 
C10 N2 Co1 119.3(4) . . ? 
O4D N2 Co1 135.9(7) . . ? 
O4 N2 Co1 118.7(4) . . ? 
C23 N3 O1 117.0(4) . . ? 
C23 N3 Co1 120.2(4) . . ? 
O1 N3 Co1 122.6(3) . . ? 
C24 N4 O5 117.4(5) . . ? 
C24 N4 O5D 117.9(8) . . ? 
O5 N4 O5D 18.2(6) . . ? 
C24 N4 Co1 120.1(4) . . ? 
O5 N4 Co1 121.9(4) . . ? 
O5D N4 Co1 121.1(7) . . ? 
C37 N5 O2 117.1(4) . . ? 
C37 N5 Co1 120.0(4) . . ? 
O2 N5 Co1 122.3(3) . . ? 
C38 N6 O6 113.6(5) . . ? 
C38 N6 O6D 128.0(7) . . ? 
O6 N6 O6D 18.3(6) . . ? 
C38 N6 Co1 120.5(4) . . ? 
O6 N6 Co1 125.9(4) . . ? 
O6D N6 Co1 110.1(6) . . ? 
O2 B1 O3 113.2(4) . . ? 
O2 B1 O1 112.0(4) . . ? 
O3 B1 O1 111.0(4) . . ? 
O2 B1 C8 108.4(4) . . ? 
O3 B1 C8 105.3(4) . . ? 
O1 B1 C8 106.5(4) . . ? 
C6 C5 C4D 127.4(13) . . ? 
C6 C5 C4 127.8(8) . . ? 
C4D C5 C4 12(4) . . ? 
C6 C5 S2 109.6(4) . . ? 
C4D C5 S2 122.3(11) . . ? 
C4 C5 S2 122.4(8) . . ? 
C5 C6 C7 113.3(5) . . ? 
C5 C6 H6A 123.4 . . ? 
C7 C6 H6A 123.4 . . ? 
C8 C7 C6 114.5(5) . . ? 
C8 C7 H7A 122.8 . . ? 
C6 C7 H7A 122.8 . . ? 
C7 C8 B1 130.1(5) . . ? 
C7 C8 S2 109.0(4) . . ? 
B1 C8 S2 120.9(4) . . ? 
N1 C9 C10 111.7(5) . . ? 
N1 C9 C11 124.1(5) . . ? 
C10 C9 C11 124.1(5) . . ? 
N2 C10 C9 112.5(5) . . ? 
N2 C10 C17 124.4(5) . . ? 
C9 C10 C17 123.1(5) . . ? 
C12 C11 C16 118.1(5) . . ? 
C12 C11 C9 121.4(5) . . ? 
C16 C11 C9 120.5(5) . . ? 
C13 C12 C11 120.8(6) . . ? 
C13 C12 H12A 119.6 . . ? 
C11 C12 H12A 119.6 . . ? 
C14 C13 C12 120.4(6) . . ? 
C14 C13 H13A 119.8 . . ? 
C12 C13 H13A 119.8 . . ? 
C13 C14 C15 119.8(6) . . ? 
C13 C14 H14A 120.1 . . ? 
C15 C14 H14A 120.1 . . ? 
C14 C15 C16 120.2(6) . . ? 
C14 C15 H15A 119.9 . . ? 
C16 C15 H15A 119.9 . . ? 
C15 C16 C11 120.6(6) . . ? 
C15 C16 H16A 119.7 . . ? 
C11 C16 H16A 119.7 . . ? 
C18 C17 C22 119.2(6) . . ? 
C18 C17 C10 121.3(5) . . ? 
C22 C17 C10 119.3(5) . . ? 
C17 C18 C19 119.8(6) . . ? 
C17 C18 H18A 120.1 . . ? 
C19 C18 H18A 120.1 . . ? 
C20 C19 C18 120.3(6) . . ? 
C20 C19 H19A 119.9 . . ? 
C18 C19 H19A 119.9 . . ? 
C19 C20 C21 119.8(6) . . ? 
C19 C20 H20A 120.1 . . ? 
C21 C20 H20A 120.1 . . ? 
C22 C21 C20 121.0(6) . . ? 
C22 C21 H21A 119.5 . . ? 
C20 C21 H21A 119.5 . . ? 
C21 C22 C17 119.8(6) . . ? 
C21 C22 H22A 120.1 . . ? 
C17 C22 H22A 120.1 . . ? 
N3 C23 C25 124.8(5) . . ? 
N3 C23 C24 112.2(5) . . ? 
C25 C23 C24 123.0(5) . . ? 
N4 C24 C31 126.0(5) . . ? 
N4 C24 C23 111.7(5) . . ? 
C31 C24 C23 122.2(5) . . ? 
C26 C25 C30 119.1(5) . . ? 
C26 C25 C23 120.7(5) . . ? 
C30 C25 C23 120.1(5) . . ? 
C25 C26 C27 119.8(6) . . ? 
C25 C26 H26A 120.1 . . ? 
C27 C26 H26A 120.1 . . ? 
C28 C27 C26 120.7(7) . . ? 
C28 C27 H27A 119.6 . . ? 
C26 C27 H27A 119.6 . . ? 
C29 C28 C27 119.6(6) . . ? 
C29 C28 H28A 120.2 . . ? 
C27 C28 H28A 120.2 . . ? 
C28 C29 C30 120.8(6) . . ? 
C28 C29 H29A 119.6 . . ? 
C30 C29 H29A 119.6 . . ? 
C29 C30 C25 119.9(6) . . ? 
C29 C30 H30A 120.0 . . ? 
C25 C30 H30A 120.0 . . ? 
C32 C31 C36 119.1(6) . . ? 
C32 C31 C24 120.3(6) . . ? 
C36 C31 C24 120.6(6) . . ? 
C31 C32 C33 120.6(7) . . ? 
C31 C32 H32A 119.7 . . ? 
C33 C32 H32A 119.7 . . ? 
C34 C33 C32 121.1(8) . . ? 
C34 C33 H33A 119.4 . . ? 
C32 C33 H33A 119.4 . . ? 
C33 C34 C35 119.9(7) . . ? 
C33 C34 H34A 120.1 . . ? 
C35 C34 H34A 120.1 . . ? 
C36 C35 C34 119.1(8) . . ? 
C36 C35 H35A 120.4 . . ? 
C34 C35 H35A 120.4 . . ? 
C35 C36 C31 120.2(7) . . ? 
C35 C36 H36A 119.9 . . ? 
C31 C36 H36A 119.9 . . ? 
N5 C37 C39 127.3(5) . . ? 
N5 C37 C38 111.0(5) . . ? 
C39 C37 C38 121.7(5) . . ? 
N6 C38 C37 112.4(5) . . ? 
N6 C38 C45 124.6(5) . . ? 
C37 C38 C45 123.1(5) . . ? 
C40 C39 C44 118.4(6) . . ? 
C40 C39 C37 121.5(5) . . ? 
C44 C39 C37 120.1(5) . . ? 
C41 C40 C39 120.1(6) . . ? 
C41 C40 H40A 119.9 . . ? 
C39 C40 H40A 119.9 . . ? 
C40 C41 C42 121.3(7) . . ? 
C40 C41 H41A 119.3 . . ? 
C42 C41 H41A 119.3 . . ? 
C43 C42 C41 119.1(7) . . ? 
C43 C42 H42A 120.5 . . ? 
C41 C42 H42A 120.5 . . ? 
C42 C43 C44 120.5(7) . . ? 
C42 C43 H43A 119.8 . . ? 
C44 C43 H43A 119.8 . . ? 
C43 C44 C39 120.6(6) . . ? 
C43 C44 H44A 119.7 . . ? 
C39 C44 H44A 119.7 . . ? 
C50 C45 C46 119.3(6) . . ? 
C50 C45 C38 121.1(5) . . ? 
C46 C45 C38 119.6(6) . . ? 
C45 C46 C47 119.6(7) . . ? 
C45 C46 H46A 120.2 . . ? 
C47 C46 H46A 120.2 . . ? 
C48 C47 C46 120.3(7) . . ? 
C48 C47 H47A 119.8 . . ? 
C46 C47 H47A 119.8 . . ? 
C47 C48 C49 120.9(7) . . ? 
C47 C48 H48A 119.5 . . ? 
C49 C48 H48A 119.5 . . ? 
C48 C49 C50 119.2(7) . . ? 
C48 C49 H49A 120.4 . . ? 
C50 C49 H49A 120.4 . . ? 
C45 C50 C49 120.7(6) . . ? 
C45 C50 H50A 119.6 . . ? 
C49 C50 H50A 119.6 . . ? 
O4 B2 O6 112.5(6) . . ? 
O4 B2 O5 110.6(6) . . ? 
O6 B2 O5 112.0(6) . . ? 
O4 B2 C51 111.0(6) . . ? 
O6 B2 C51 103.0(6) . . ? 
O5 B2 C51 107.3(6) . . ? 
N2 O4 B2 114.8(6) . . ? 
N4 O5 B2 112.8(6) . . ? 
N6 O6 B2 110.9(5) . . ? 
C51 S3 C54 95.0(4) . . ? 
C52 C51 B2 124.9(7) . . ? 
C52 C51 S3 107.1(5) . . ? 
B2 C51 S3 128.0(6) . . ? 
C51 C52 C53 115.0(7) . . ? 
C51 C52 H52 122.5 . . ? 
C53 C52 H52 122.5 . . ? 
C54 C53 C52 113.9(7) . . ? 
C54 C53 H53 123.1 . . ? 
C52 C53 H53 123.1 . . ? 
C53 C54 C55 125.7(8) . . ? 
C53 C54 S3 109.0(6) . . ? 
C55 C54 S3 125.3(7) . . ? 
C58 S4 C55 100.7(6) . . ? 
C54 C55 C56 119.3(9) . . ? 
C54 C55 S4 122.5(9) . . ? 
C56 C55 S4 118.1(7) . . ? 
C57 C56 C55 92.6(7) . . ? 
C57 C56 H56 133.7 . . ? 
C55 C56 H56 133.7 . . ? 
C58 C57 C56 121.9(9) . . ? 
C58 C57 H57 119.1 . . ? 
C56 C57 H57 119.1 . . ? 
C57 C58 S4 106.6(7) . . ? 
C57 C58 H58 126.7 . . ? 
S4 C58 H58 126.7 . . ? 
O4D B2D O6D 112.6(12) . . ? 
O4D B2D O5D 111.4(12) . . ? 
O6D B2D O5D 113.0(13) . . ? 
O4D B2D C51D 103.3(12) . . ? 
O6D B2D C51D 108.9(12) . . ? 
O5D B2D C51D 107.0(12) . . ? 
N2 O4D B2D 101.8(11) . . ? 
N4 O5D B2D 110.6(12) . . ? 
B2D O6D N6 121.6(11) . . ? 
C51D S3D C54D 95.7(7) . . ? 
C52D C51D B2D 125.9(12) . . ? 
C52D C51D S3D 107.8(9) . . ? 
B2D C51D S3D 126.3(10) . . ? 
C53D C52D C51D 114.9(12) . . ? 
C53D C52D H52D 122.6 . . ? 
C51D C52D H52D 122.6 . . ? 
C54D C53D C52D 111.8(12) . . ? 
C54D C53D H53D 124.1 . . ? 
C52D C53D H53D 124.1 . . ? 
C53D C54D C55D 122.0(13) . . ? 
C53D C54D S3D 109.8(10) . . ? 
C55D C54D S3D 128.1(12) . . ? 
C55D S4D C58D 89.0(10) . . ? 
C54D C55D C56D 121.4(15) . . ? 
C54D C55D S4D 112.1(14) . . ? 
C56D C55D S4D 126.5(11) . . ? 
C55D C56D C57D 99.4(10) . . ? 
C55D C56D H56D 130.3 . . ? 
C57D C56D H56D 130.3 . . ? 
C58D C57D C56D 103.6(11) . . ? 
C58D C57D H57D 128.2 . . ? 
C56D C57D H57D 128.2 . . ? 
C57D C58D S4D 121.4(12) . . ? 
C57D C58D H58D 119.3 . . ? 
S4D C58D H58D 119.3 . . ? 
C67 N7 C59 106.1(4) . . ? 
C67 N7 C63 112.2(5) . . ? 
C59 N7 C63 111.2(5) . . ? 
C67 N7 C71 111.0(4) . . ? 
C59 N7 C71 111.6(5) . . ? 
C63 N7 C71 105.0(4) . . ? 
C60 C59 N7 115.3(5) . . ? 
C60 C59 H59A 108.4 . . ? 
N7 C59 H59A 108.4 . . ? 
C60 C59 H59B 108.4 . . ? 
N7 C59 H59B 108.4 . . ? 
H59A C59 H59B 107.5 . . ? 
C61 C60 C61D 7(4) . . ? 
C61 C60 C59 113.2(15) . . ? 
C61D C60 C59 107.8(16) . . ? 
C61 C60 H60A 108.9 . . ? 
C61D C60 H60A 107.8 . . ? 
C59 C60 H60A 108.9 . . ? 
C61 C60 H60B 108.9 . . ? 
C61D C60 H60B 115.4 . . ? 
C59 C60 H60B 108.9 . . ? 
H60A C60 H60B 107.8 . . ? 
C62 C61 C60 107(2) . . ? 
C62 C61 H61A 110.3 . . ? 
C60 C61 H61A 110.3 . . ? 
C62 C61 H61B 110.3 . . ? 
C60 C61 H61B 110.3 . . ? 
H61A C61 H61B 108.6 . . ? 
C62D C61D C60 115(2) . . ? 
C62D C61D H61C 108.6 . . ? 
C60 C61D H61C 108.6 . . ? 
C62D C61D H61D 108.6 . . ? 
C60 C61D H61D 108.6 . . ? 
H61C C61D H61D 107.5 . . ? 
C61D C62D H62D 109.5 . . ? 
C61D C62D H62E 109.5 . . ? 
H62D C62D H62E 109.5 . . ? 
C61D C62D H62F 109.5 . . ? 
H62D C62D H62F 109.5 . . ? 
H62E C62D H62F 109.5 . . ? 
C64 C63 N7 115.4(5) . . ? 
C64 C63 H63A 108.4 . . ? 
N7 C63 H63A 108.4 . . ? 
C64 C63 H63B 108.4 . . ? 
N7 C63 H63B 108.4 . . ? 
H63A C63 H63B 107.5 . . ? 
C65 C64 C63 109.7(5) . . ? 
C65 C64 H64A 109.7 . . ? 
C63 C64 H64A 109.7 . . ? 
C65 C64 H64B 109.7 . . ? 
C63 C64 H64B 109.7 . . ? 
H64A C64 H64B 108.2 . . ? 
C66 C65 C64 114.6(6) . . ? 
C66 C65 H65A 108.6 . . ? 
C64 C65 H65A 108.6 . . ? 
C66 C65 H65B 108.6 . . ? 
C64 C65 H65B 108.6 . . ? 
H65A C65 H65B 107.6 . . ? 
C65 C66 H66A 109.5 . . ? 
C65 C66 H66B 109.5 . . ? 
H66A C66 H66B 109.5 . . ? 
C65 C66 H66C 109.5 . . ? 
H66A C66 H66C 109.5 . . ? 
H66B C66 H66C 109.5 . . ? 
N7 C67 C68 115.6(5) . . ? 
N7 C67 H67A 108.4 . . ? 
C68 C67 H67A 108.4 . . ? 
N7 C67 H67B 108.4 . . ? 
C68 C67 H67B 108.4 . . ? 
H67A C67 H67B 107.4 . . ? 
C67 C68 C69 110.4(5) . . ? 
C67 C68 H68A 109.6 . . ? 
C69 C68 H68A 109.6 . . ? 
C67 C68 H68B 109.6 . . ? 
C69 C68 H68B 109.6 . . ? 
H68A C68 H68B 108.1 . . ? 
C70 C69 C68 110.9(6) . . ? 
C70 C69 H69A 109.5 . . ? 
C68 C69 H69A 109.5 . . ? 
C70 C69 H69B 109.5 . . ? 
C68 C69 H69B 109.5 . . ? 
H69A C69 H69B 108.1 . . ? 
C69 C70 H70A 109.5 . . ? 
C69 C70 H70B 109.5 . . ? 
H70A C70 H70B 109.5 . . ? 
C69 C70 H70C 109.5 . . ? 
H70A C70 H70C 109.5 . . ? 
H70B C70 H70C 109.5 . . ? 
C72 C71 N7 116.4(4) . . ? 
C72 C71 H71A 108.2 . . ? 
N7 C71 H71A 108.2 . . ? 
C72 C71 H71B 108.2 . . ? 
N7 C71 H71B 108.2 . . ? 
H71A C71 H71B 107.3 . . ? 
C73 C72 C71 109.3(5) . . ? 
C73 C72 H72A 109.8 . . ? 
C71 C72 H72A 109.8 . . ? 
C73 C72 H72B 109.8 . . ? 
C71 C72 H72B 109.8 . . ? 
H72A C72 H72B 108.3 . . ? 
C74 C73 C72 113.2(5) . . ? 
C74 C73 H73A 108.9 . . ? 
C72 C73 H73A 108.9 . . ? 
C74 C73 H73B 108.9 . . ? 
C72 C73 H73B 108.9 . . ? 
H73A C73 H73B 107.7 . . ? 
C73 C74 H74A 109.5 . . ? 
C73 C74 H74B 109.5 . . ? 
H74A C74 H74B 109.5 . . ? 
C73 C74 H74C 109.5 . . ? 
H74A C74 H74C 109.5 . . ? 
H74B C74 H74C 109.5 . . ? 
C2S C1S C6S 117.5(6) . . ? 
C2S C1S C7S 122.0(7) . . ? 
C6S C1S C7S 120.5(7) . . ? 
C1S C2S C3S 121.7(6) . . ? 
C1S C2S H2SA 119.2 . . ? 
C3S C2S H2SA 119.2 . . ? 
C4S C3S C2S 120.0(7) . . ? 
C4S C3S H3SA 120.0 . . ? 
C2S C3S H3SA 120.0 . . ? 
C3S C4S C5S 119.2(6) . . ? 
C3S C4S H4SA 120.4 . . ? 
C5S C4S H4SA 120.4 . . ? 
C6S C5S C4S 121.0(7) . . ? 
C6S C5S H5SA 119.5 . . ? 
C4S C5S H5SA 119.5 . . ? 
C5S C6S C1S 120.7(6) . . ? 
C5S C6S H6SA 119.7 . . ? 
C1S C6S H6SA 119.7 . . ? 
C1S C7S H7SA 109.5 . . ? 
C1S C7S H7SB 109.5 . . ? 
H7SA C7S H7SB 109.5 . . ? 
C1S C7S H7SC 109.5 . . ? 
H7SA C7S H7SC 109.5 . . ? 
H7SB C7S H7SC 109.5 . . ? 
 
loop_ 
 _geom_torsion_atom_site_label_1 
 _geom_torsion_atom_site_label_2 
 _geom_torsion_atom_site_label_3 
 _geom_torsion_atom_site_label_4 
 _geom_torsion 
 _geom_torsion_site_symmetry_1 
 _geom_torsion_site_symmetry_2 
 _geom_torsion_site_symmetry_3 
 _geom_torsion_site_symmetry_4 
 _geom_torsion_publ_flag 
C4 S1 C1 C2 6(3) . . . . ? 
S1 C1 C2 C3 0(4) . . . . ? 
C1 C2 C3 C4 -8(5) . . . . ? 
C2 C3 C4 C5 172(3) . . . . ? 
C2 C3 C4 S1 13(4) . . . . ? 
C1 S1 C4 C3 -11(3) . . . . ? 
C1 S1 C4 C5 -171(2) . . . . ? 
C4D S1D C1D C2D 7(6) . . . . ? 
S1D C1D C2D C3D 5(7) . . . . ? 
C1D C2D C3D C4D -19(7) . . . . ? 
C2D C3D C4D C5 174(4) . . . . ? 
C2D C3D C4D S1D 24(5) . . . . ? 
C1D S1D C4D C3D -18(5) . . . . ? 
C1D S1D C4D C5 -169(5) . . . . ? 
B1 O3 N1 C9 -179.3(4) . . . . ? 
B1 O3 N1 Co1 -3.8(5) . . . . ? 
N6 Co1 N1 C9 -74.5(5) . . . . ? 
N3 Co1 N1 C9 135.4(4) . . . . ? 
N2 Co1 N1 C9 -2.4(4) . . . . ? 
N5 Co1 N1 C9 -138.5(4) . . . . ? 
N4 Co1 N1 C9 66.9(5) . . . . ? 
N6 Co1 N1 O3 110.0(4) . . . . ? 
N3 Co1 N1 O3 -40.1(3) . . . . ? 
N2 Co1 N1 O3 -177.8(4) . . . . ? 
N5 Co1 N1 O3 46.0(3) . . . . ? 
N4 Co1 N1 O3 -108.6(4) . . . . ? 
N6 Co1 N2 C10 140.5(4) . . . . ? 
N1 Co1 N2 C10 1.9(4) . . . . ? 
N3 Co1 N2 C10 -70.0(5) . . . . ? 
N5 Co1 N2 C10 72.3(5) . . . . ? 
N4 Co1 N2 C10 -133.3(4) . . . . ? 
N6 Co1 N2 O4D -49.2(11) . . . . ? 
N1 Co1 N2 O4D 172.3(11) . . . . ? 
N3 Co1 N2 O4D 100.3(11) . . . . ? 
N5 Co1 N2 O4D -117.4(11) . . . . ? 
N4 Co1 N2 O4D 37.0(11) . . . . ? 
N6 Co1 N2 O4 -36.7(4) . . . . ? 
N1 Co1 N2 O4 -175.3(5) . . . . ? 
N3 Co1 N2 O4 112.8(5) . . . . ? 
N5 Co1 N2 O4 -105.0(4) . . . . ? 
N4 Co1 N2 O4 49.5(4) . . . . ? 
B1 O1 N3 C23 177.1(5) . . . . ? 
B1 O1 N3 Co1 1.8(5) . . . . ? 
N6 Co1 N3 C23 72.9(5) . . . . ? 
N1 Co1 N3 C23 -133.7(4) . . . . ? 
N2 Co1 N3 C23 -66.1(5) . . . . ? 
N5 Co1 N3 C23 140.6(4) . . . . ? 
N4 Co1 N3 C23 0.3(4) . . . . ? 
N6 Co1 N3 O1 -111.9(4) . . . . ? 
N1 Co1 N3 O1 41.4(4) . . . . ? 
N2 Co1 N3 O1 109.1(4) . . . . ? 
N5 Co1 N3 O1 -44.2(4) . . . . ? 
N4 Co1 N3 O1 175.5(4) . . . . ? 
N6 Co1 N4 C24 -132.0(5) . . . . ? 
N1 Co1 N4 C24 73.8(5) . . . . ? 
N3 Co1 N4 C24 0.3(4) . . . . ? 
N2 Co1 N4 C24 139.8(5) . . . . ? 
N5 Co1 N4 C24 -67.7(5) . . . . ? 
N6 Co1 N4 O5 38.4(4) . . . . ? 
N1 Co1 N4 O5 -115.8(4) . . . . ? 
N3 Co1 N4 O5 170.8(5) . . . . ? 
N2 Co1 N4 O5 -49.8(4) . . . . ? 
N5 Co1 N4 O5 102.8(5) . . . . ? 
N6 Co1 N4 O5D 59.7(7) . . . . ? 
N1 Co1 N4 O5D -94.5(7) . . . . ? 
N3 Co1 N4 O5D -167.9(7) . . . . ? 
N2 Co1 N4 O5D -28.5(7) . . . . ? 
N5 Co1 N4 O5D 124.1(7) . . . . ? 
B1 O2 N5 C37 173.2(5) . . . . ? 
B1 O2 N5 Co1 2.4(5) . . . . ? 
N6 Co1 N5 C37 3.8(4) . . . . ? 
N1 Co1 N5 C37 143.7(4) . . . . ? 
N3 Co1 N5 C37 -128.6(4) . . . . ? 
N2 Co1 N5 C37 77.1(5) . . . . ? 
N4 Co1 N5 C37 -64.3(5) . . . . ? 
N6 Co1 N5 O2 174.4(4) . . . . ? 
N1 Co1 N5 O2 -45.8(4) . . . . ? 
N3 Co1 N5 O2 42.0(4) . . . . ? 
N2 Co1 N5 O2 -112.4(4) . . . . ? 
N4 Co1 N5 O2 106.3(4) . . . . ? 
N1 Co1 N6 C38 -67.8(5) . . . . ? 
N3 Co1 N6 C38 72.1(5) . . . . ? 
N2 Co1 N6 C38 -135.5(5) . . . . ? 
N5 Co1 N6 C38 -0.1(4) . . . . ? 
N4 Co1 N6 C38 140.2(5) . . . . ? 
N1 Co1 N6 O6 110.2(5) . . . . ? 
N3 Co1 N6 O6 -109.9(5) . . . . ? 
N2 Co1 N6 O6 42.5(5) . . . . ? 
N5 Co1 N6 O6 177.8(5) . . . . ? 
N4 Co1 N6 O6 -41.8(5) . . . . ? 
N1 Co1 N6 O6D 99.7(8) . . . . ? 
N3 Co1 N6 O6D -120.5(8) . . . . ? 
N2 Co1 N6 O6D 31.9(8) . . . . ? 
N5 Co1 N6 O6D 167.3(8) . . . . ? 
N4 Co1 N6 O6D -52.4(8) . . . . ? 
N5 O2 B1 O3 61.0(5) . . . . ? 
N5 O2 B1 O1 -65.4(5) . . . . ? 
N5 O2 B1 C8 177.5(4) . . . . ? 
N1 O3 B1 O2 -61.0(5) . . . . ? 
N1 O3 B1 O1 66.0(5) . . . . ? 
N1 O3 B1 C8 -179.2(4) . . . . ? 
N3 O1 B1 O2 63.3(5) . . . . ? 
N3 O1 B1 O3 -64.3(5) . . . . ? 
N3 O1 B1 C8 -178.5(4) . . . . ? 
C3D C4D C5 C6 -178(3) . . . . ? 
S1D C4D C5 C6 -30(6) . . . . ? 
C3D C4D C5 C4 -81(10) . . . . ? 
S1D C4D C5 C4 66(7) . . . . ? 
C3D C4D C5 S2 14(6) . . . . ? 
S1D C4D C5 S2 161(2) . . . . ? 
C3 C4 C5 C6 4(4) . . . . ? 
S1 C4 C5 C6 161.5(12) . . . . ? 
C3 C4 C5 C4D -88(9) . . . . ? 
S1 C4 C5 C4D 69(8) . . . . ? 
C3 C4 C5 S2 179(3) . . . . ? 
S1 C4 C5 S2 -24(3) . . . . ? 
C8 S2 C5 C6 -0.6(5) . . . . ? 
C8 S2 C5 C4D 170(3) . . . . ? 
C8 S2 C5 C4 -176.3(16) . . . . ? 
C4D C5 C6 C7 -170(3) . . . . ? 
C4 C5 C6 C7 175.6(17) . . . . ? 
S2 C5 C6 C7 0.3(7) . . . . ? 
C5 C6 C7 C8 0.4(8) . . . . ? 
C6 C7 C8 B1 179.1(5) . . . . ? 
C6 C7 C8 S2 -0.9(6) . . . . ? 
O2 B1 C8 C7 105.3(6) . . . . ? 
O3 B1 C8 C7 -133.2(6) . . . . ? 
O1 B1 C8 C7 -15.3(8) . . . . ? 
O2 B1 C8 S2 -74.7(5) . . . . ? 
O3 B1 C8 S2 46.8(5) . . . . ? 
O1 B1 C8 S2 164.7(3) . . . . ? 
C5 S2 C8 C7 0.9(4) . . . . ? 
C5 S2 C8 B1 -179.1(4) . . . . ? 
O3 N1 C9 C10 178.0(4) . . . . ? 
Co1 N1 C9 C10 2.3(6) . . . . ? 
O3 N1 C9 C11 1.4(7) . . . . ? 
Co1 N1 C9 C11 -174.2(4) . . . . ? 
O4D N2 C10 C9 -174.4(8) . . . . ? 
O4 N2 C10 C9 175.8(5) . . . . ? 
Co1 N2 C10 C9 -1.3(6) . . . . ? 
O4D N2 C10 C17 5.5(10) . . . . ? 
O4 N2 C10 C17 -4.3(8) . . . . ? 
Co1 N2 C10 C17 178.6(4) . . . . ? 
N1 C9 C10 N2 -0.6(6) . . . . ? 
C11 C9 C10 N2 175.9(5) . . . . ? 
N1 C9 C10 C17 179.5(5) . . . . ? 
C11 C9 C10 C17 -3.9(8) . . . . ? 
N1 C9 C11 C12 -43.5(8) . . . . ? 
C10 C9 C11 C12 140.3(5) . . . . ? 
N1 C9 C11 C16 135.8(5) . . . . ? 
C10 C9 C11 C16 -40.3(7) . . . . ? 
C16 C11 C12 C13 1.3(8) . . . . ? 
C9 C11 C12 C13 -179.4(5) . . . . ? 
C11 C12 C13 C14 0.4(9) . . . . ? 
C12 C13 C14 C15 -1.9(9) . . . . ? 
C13 C14 C15 C16 1.6(9) . . . . ? 
C14 C15 C16 C11 0.1(8) . . . . ? 
C12 C11 C16 C15 -1.5(8) . . . . ? 
C9 C11 C16 C15 179.2(5) . . . . ? 
N2 C10 C17 C18 130.1(6) . . . . ? 
C9 C10 C17 C18 -50.0(8) . . . . ? 
N2 C10 C17 C22 -54.2(8) . . . . ? 
C9 C10 C17 C22 125.7(6) . . . . ? 
C22 C17 C18 C19 -3.2(9) . . . . ? 
C10 C17 C18 C19 172.5(6) . . . . ? 
C17 C18 C19 C20 1.9(9) . . . . ? 
C18 C19 C20 C21 0.1(10) . . . . ? 
C19 C20 C21 C22 -0.8(10) . . . . ? 
C20 C21 C22 C17 -0.5(10) . . . . ? 
C18 C17 C22 C21 2.5(9) . . . . ? 
C10 C17 C22 C21 -173.3(6) . . . . ? 
O1 N3 C23 C25 1.5(8) . . . . ? 
Co1 N3 C23 C25 176.9(4) . . . . ? 
O1 N3 C23 C24 -176.2(4) . . . . ? 
Co1 N3 C23 C24 -0.8(6) . . . . ? 
O5 N4 C24 C31 8.3(9) . . . . ? 
O5D N4 C24 C31 -12.2(10) . . . . ? 
Co1 N4 C24 C31 179.2(5) . . . . ? 
O5 N4 C24 C23 -171.7(5) . . . . ? 
O5D N4 C24 C23 167.8(8) . . . . ? 
Co1 N4 C24 C23 -0.8(7) . . . . ? 
N3 C23 C24 N4 1.0(7) . . . . ? 
C25 C23 C24 N4 -176.8(5) . . . . ? 
N3 C23 C24 C31 -179.0(5) . . . . ? 
C25 C23 C24 C31 3.2(9) . . . . ? 
N3 C23 C25 C26 63.5(8) . . . . ? 
C24 C23 C25 C26 -119.0(6) . . . . ? 
N3 C23 C25 C30 -119.5(6) . . . . ? 
C24 C23 C25 C30 58.0(8) . . . . ? 
C30 C25 C26 C27 -1.7(9) . . . . ? 
C23 C25 C26 C27 175.3(6) . . . . ? 
C25 C26 C27 C28 3.0(10) . . . . ? 
C26 C27 C28 C29 -2.1(11) . . . . ? 
C27 C28 C29 C30 0.0(10) . . . . ? 
C28 C29 C30 C25 1.3(9) . . . . ? 
C26 C25 C30 C29 -0.4(9) . . . . ? 
C23 C25 C30 C29 -177.4(5) . . . . ? 
N4 C24 C31 C32 -133.1(6) . . . . ? 
C23 C24 C31 C32 46.9(8) . . . . ? 
N4 C24 C31 C36 49.1(9) . . . . ? 
C23 C24 C31 C36 -130.9(6) . . . . ? 
C36 C31 C32 C33 -0.2(9) . . . . ? 
C24 C31 C32 C33 -178.0(6) . . . . ? 
C31 C32 C33 C34 1.0(11) . . . . ? 
C32 C33 C34 C35 -0.5(12) . . . . ? 
C33 C34 C35 C36 -0.9(11) . . . . ? 
C34 C35 C36 C31 1.7(10) . . . . ? 
C32 C31 C36 C35 -1.2(9) . . . . ? 
C24 C31 C36 C35 176.6(6) . . . . ? 
O2 N5 C37 C39 2.6(8) . . . . ? 
Co1 N5 C37 C39 173.6(4) . . . . ? 
O2 N5 C37 C38 -177.3(4) . . . . ? 
Co1 N5 C37 C38 -6.2(6) . . . . ? 
O6 N6 C38 C37 178.8(5) . . . . ? 
O6D N6 C38 C37 -167.9(9) . . . . ? 
Co1 N6 C38 C37 -3.0(7) . . . . ? 
O6 N6 C38 C45 -2.2(8) . . . . ? 
O6D N6 C38 C45 11.0(12) . . . . ? 
Co1 N6 C38 C45 176.0(4) . . . . ? 
N5 C37 C38 N6 5.7(7) . . . . ? 
C39 C37 C38 N6 -174.2(5) . . . . ? 
N5 C37 C38 C45 -173.3(5) . . . . ? 
C39 C37 C38 C45 6.8(9) . . . . ? 
N5 C37 C39 C40 50.4(9) . . . . ? 
C38 C37 C39 C40 -129.7(6) . . . . ? 
N5 C37 C39 C44 -131.5(6) . . . . ? 
C38 C37 C39 C44 48.3(8) . . . . ? 
C44 C39 C40 C41 -1.8(9) . . . . ? 
C37 C39 C40 C41 176.3(6) . . . . ? 
C39 C40 C41 C42 1.0(10) . . . . ? 
C40 C41 C42 C43 -0.1(10) . . . . ? 
C41 C42 C43 C44 0.0(10) . . . . ? 
C42 C43 C44 C39 -0.9(10) . . . . ? 
C40 C39 C44 C43 1.8(9) . . . . ? 
C37 C39 C44 C43 -176.4(6) . . . . ? 
N6 C38 C45 C50 49.6(10) . . . . ? 
C37 C38 C45 C50 -131.6(7) . . . . ? 
N6 C38 C45 C46 -129.4(8) . . . . ? 
C37 C38 C45 C46 49.5(10) . . . . ? 
C50 C45 C46 C47 0.7(13) . . . . ? 
C38 C45 C46 C47 179.6(8) . . . . ? 
C45 C46 C47 C48 -1.7(16) . . . . ? 
C46 C47 C48 C49 2.4(16) . . . . ? 
C47 C48 C49 C50 -2.1(13) . . . . ? 
C46 C45 C50 C49 -0.4(11) . . . . ? 
C38 C45 C50 C49 -179.3(7) . . . . ? 
C48 C49 C50 C45 1.0(11) . . . . ? 
C10 N2 O4 B2 177.2(6) . . . . ? 
O4D N2 O4 B2 148(3) . . . . ? 
Co1 N2 O4 B2 -5.6(7) . . . . ? 
O6 B2 O4 N2 65.9(8) . . . . ? 
O5 B2 O4 N2 -60.1(8) . . . . ? 
C51 B2 O4 N2 -179.2(6) . . . . ? 
C24 N4 O5 B2 174.5(6) . . . . ? 
O5D N4 O5 B2 -89(3) . . . . ? 
Co1 N4 O5 B2 3.9(7) . . . . ? 
O4 B2 O5 N4 61.0(7) . . . . ? 
O6 B2 O5 N4 -65.4(7) . . . . ? 
C51 B2 O5 N4 -177.7(5) . . . . ? 
C38 N6 O6 B2 177.6(6) . . . . ? 
O6D N6 O6 B2 33(3) . . . . ? 
Co1 N6 O6 B2 -0.5(8) . . . . ? 
O4 B2 O6 N6 -62.0(8) . . . . ? 
O5 B2 O6 N6 63.4(8) . . . . ? 
C51 B2 O6 N6 178.4(6) . . . . ? 
O4 B2 C51 C52 -144.0(7) . . . . ? 
O6 B2 C51 C52 -23.4(9) . . . . ? 
O5 B2 C51 C52 95.0(8) . . . . ? 
O4 B2 C51 S3 39.5(9) . . . . ? 
O6 B2 C51 S3 160.1(6) . . . . ? 
O5 B2 C51 S3 -81.6(8) . . . . ? 
C54 S3 C51 C52 0.1(5) . . . . ? 
C54 S3 C51 B2 177.1(7) . . . . ? 
B2 C51 C52 C53 -176.8(7) . . . . ? 
S3 C51 C52 C53 0.3(7) . . . . ? 
C51 C52 C53 C54 -0.7(9) . . . . ? 
C52 C53 C54 C55 179.4(6) . . . . ? 
C52 C53 C54 S3 0.7(8) . . . . ? 
C51 S3 C54 C53 -0.5(6) . . . . ? 
C51 S3 C54 C55 -179.1(6) . . . . ? 
C53 C54 C55 C56 160.6(8) . . . . ? 
S3 C54 C55 C56 -21.0(10) . . . . ? 
C53 C54 C55 S4 -16.7(11) . . . . ? 
S3 C54 C55 S4 161.7(6) . . . . ? 
C58 S4 C55 C54 178.9(6) . . . . ? 
C58 S4 C55 C56 1.6(8) . . . . ? 
C54 C55 C56 C57 -178.9(6) . . . . ? 
S4 C55 C56 C57 -1.5(8) . . . . ? 
C55 C56 C57 C58 0.9(8) . . . . ? 
C56 C57 C58 S4 0.0(9) . . . . ? 
C55 S4 C58 C57 -0.9(6) . . . . ? 
C10 N2 O4D B2D 176.7(9) . . . . ? 
O4 N2 O4D B2D -29(2) . . . . ? 
Co1 N2 O4D B2D 5.4(16) . . . . ? 
O6D B2D O4D N2 58.0(15) . . . . ? 
O5D B2D O4D N2 -70.1(15) . . . . ? 
C51D B2D O4D N2 175.4(12) . . . . ? 
C24 N4 O5D B2D 179.1(9) . . . . ? 
O5 N4 O5D B2D 86(3) . . . . ? 
Co1 N4 O5D B2D -12.4(13) . . . . ? 
O4D B2D O5D N4 76.0(14) . . . . ? 
O6D B2D O5D N4 -51.9(15) . . . . ? 
C51D B2D O5D N4 -171.7(11) . . . . ? 
O4D B2D O6D N6 -71.2(17) . . . . ? 
O5D B2D O6D N6 56.1(18) . . . . ? 
C51D B2D O6D N6 174.8(13) . . . . ? 
C38 N6 O6D B2D 175.7(10) . . . . ? 
O6 N6 O6D B2D -142(4) . . . . ? 
Co1 N6 O6D B2D 9.5(15) . . . . ? 
O4D B2D C51D C52D 6.1(17) . . . . ? 
O6D B2D C51D C52D 126.0(13) . . . . ? 
O5D B2D C51D C52D -111.5(13) . . . . ? 
O4D B2D C51D S3D -175.6(10) . . . . ? 
O6D B2D C51D S3D -55.7(16) . . . . ? 
O5D B2D C51D S3D 66.7(15) . . . . ? 
C54D S3D C51D C52D -0.4(8) . . . . ? 
C54D S3D C51D B2D -178.9(13) . . . . ? 
B2D C51D C52D C53D 178.5(13) . . . . ? 
S3D C51D C52D C53D -0.1(10) . . . . ? 
C51D C52D C53D C54D 0.6(13) . . . . ? 
C52D C53D C54D C55D -178.6(8) . . . . ? 
C52D C53D C54D S3D -0.9(12) . . . . ? 
C51D S3D C54D C53D 0.7(10) . . . . ? 
C51D S3D C54D C55D 178.3(9) . . . . ? 
C53D C54D C55D C56D -171.2(13) . . . . ? 
S3D C54D C55D C56D 11.5(15) . . . . ? 
C53D C54D C55D S4D 10.2(14) . . . . ? 
S3D C54D C55D S4D -167.1(11) . . . . ? 
C58D S4D C55D C54D 179.3(8) . . . . ? 
C58D S4D C55D C56D 0.8(12) . . . . ? 
C54D C55D C56D C57D -179.2(8) . . . . ? 
S4D C55D C56D C57D -0.8(13) . . . . ? 
C55D C56D C57D C58D 0.3(10) . . . . ? 
C56D C57D C58D S4D 0.1(11) . . . . ? 
C55D S4D C58D C57D -0.5(10) . . . . ? 
C67 N7 C59 C60 -178.3(6) . . . . ? 
C63 N7 C59 C60 -56.1(7) . . . . ? 
C71 N7 C59 C60 60.8(7) . . . . ? 
N7 C59 C60 C61 -169.3(17) . . . . ? 
N7 C59 C60 C61D -165(2) . . . . ? 
C61D C60 C61 C62 50(17) . . . . ? 
C59 C60 C61 C62 89.3(19) . . . . ? 
C61 C60 C61D C62D -47(15) . . . . ? 
C59 C60 C61D C62D 171(3) . . . . ? 
C67 N7 C63 C64 57.3(7) . . . . ? 
C59 N7 C63 C64 -61.3(7) . . . . ? 
C71 N7 C63 C64 177.8(5) . . . . ? 
N7 C63 C64 C65 176.0(6) . . . . ? 
C63 C64 C65 C66 178.0(7) . . . . ? 
C59 N7 C67 C68 173.4(5) . . . . ? 
C63 N7 C67 C68 51.9(7) . . . . ? 
C71 N7 C67 C68 -65.1(6) . . . . ? 
N7 C67 C68 C69 -175.6(5) . . . . ? 
C67 C68 C69 C70 173.8(6) . . . . ? 
C67 N7 C71 C72 -64.8(7) . . . . ? 
C59 N7 C71 C72 53.3(7) . . . . ? 
C63 N7 C71 C72 173.9(5) . . . . ? 
N7 C71 C72 C73 -170.0(5) . . . . ? 
C71 C72 C73 C74 -178.3(6) . . . . ? 
C6S C1S C2S C3S 0.2(9) . . . . ? 
C7S C1S C2S C3S -179.1(6) . . . . ? 
C1S C2S C3S C4S 0.5(10) . . . . ? 
C2S C3S C4S C5S -0.4(10) . . . . ? 
C3S C4S C5S C6S -0.4(10) . . . . ? 
C4S C5S C6S C1S 1.2(10) . . . . ? 
C2S C1S C6S C5S -1.0(9) . . . . ? 
C7S C1S C6S C5S 178.2(6) . . . . ? 
 
_diffrn_measured_fraction_theta_max    0.989 
_diffrn_reflns_theta_full              25.56 
_diffrn_measured_fraction_theta_full   0.989 
_refine_diff_density_max    3.038 
_refine_diff_density_min   -1.918 
_refine_diff_density_rms    0.081 
